# Supplementary material for: Visible light-induced alkylpyridylation of styrenes via a reductive radical three-component coupling
Source: Royal Society of Chemistry journal article supplement (doi:10.1039/d1ob00498k), 2021-01-01
Supplement: d1ob00498k1.pdf [file d1ob00498k1.pdf]

# **Electronic Supplementary Information for Visible Light- induced Alkylpyridylation of Styrenes via a Reductive Radical Three-component Coupling**

**Jing-miao Yu,<sup>a</sup> Li-wen Zhu,<sup>b</sup> Xiao-yuan Hong,<sup>b</sup> Huan Gao,<sup>b</sup> Ting-ting Chen<sup>\*b</sup>**

<sup>a</sup>School of Pharmaceutical and Materials Engineering & Institute for Advanced Studies, Taizhou University, 1139 Shifu Avenue, Taizhou 318000, People's Republic of China

<sup>b</sup>School of Pharmaceutical and Materials Engineering, Taizhou University, 1139 Shifu Avenue, Taizhou 318000, People's Republic of China

\* Corresponding Author e-mail: [chentt@tzc.edu.cn](mailto:chentt@tzc.edu.cn).

1. General information
2. General Procedure
3. NMR spectra

## 1. General Information

All chemical reagents are obtained from commercial suppliers and used without further purification. All unknown compounds are characterized by  $^1\text{H}$  NMR,  $^{13}\text{C}$  NMR, MS, HRMS. Irradiation of visible light was performed with a 90W Kessil A360W Blue LED lamp. Analytical thin-layer chromatography are performed on glass plates precoated with silica gel impregnated with a fluorescent indicator (254 nm), and the plates are visualized by exposure to ultraviolet light.  $^1\text{H}$  NMR and  $^{13}\text{C}$  NMR spectra are recorded on an AVANCE 400 Bruker spectrometer operating at 400 MHz and 100 MHz in  $\text{CDCl}_3$ , respectively, and chemical shifts are reported in ppm. Multiplicities are indicated by s (singlet), d (doublet), t (triplet), q (quartet), m (multiplet), and br (broad). High-resolution mass spectra are taken on a Waters SYNAPT G2-Si instrument in the electrospray ionization (ESI) mode.

## 2. General Procedure

**General procedure for visible light-induced alkylpyridylation of styrenes via a reductive radical three-component coupling:** A 10 mL reaction vessel with a magnetic stirring bar was equipped with alkenes (0.2 mmol), 4-cyano pyridine (0.3 mmol), NHPI esters (0.3 mmol), HE (0.3 mmol) and MTBE (2 mL). The mixture was irradiated with a 90 W blue LED lamp (1 cm away with cooling from a fan), and stirred under Ar atmosphere at r.t. overnight. After the solvent had been removed under reduced pressure, the residue was purified by flash chromatography using PE-AcOEt (10:1-8:1, v/v) as the eluent to 1,1-diaryllalkane derivatives.

## 3. NMR Spectra of All Products

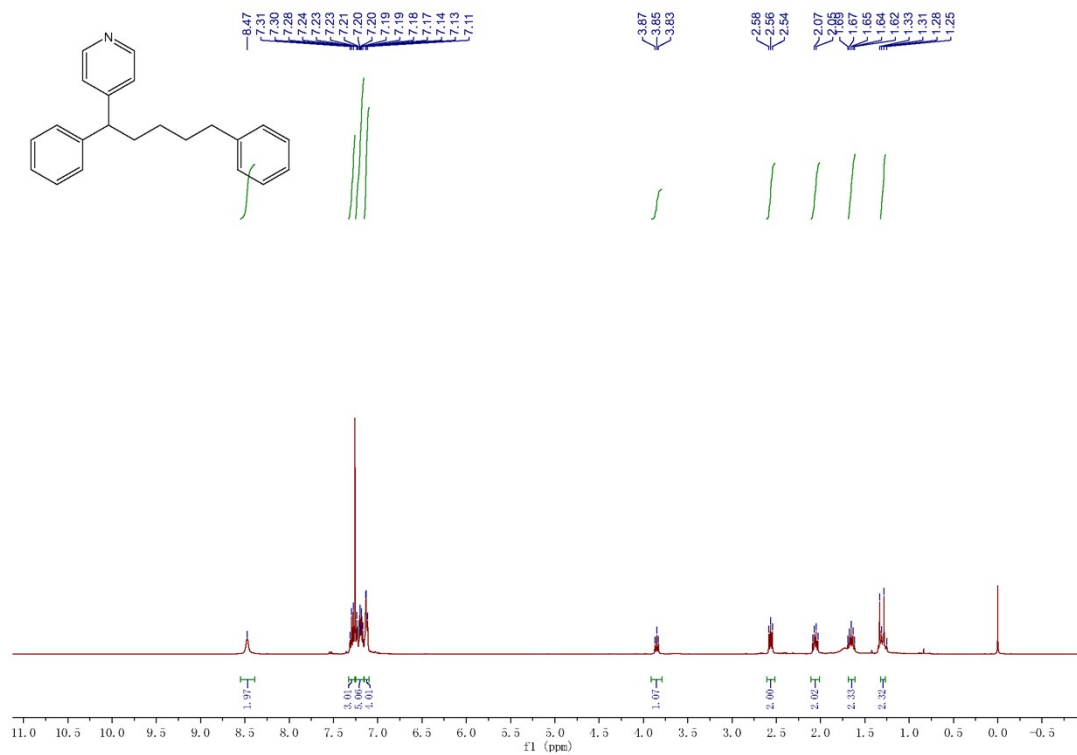

**<sup>1</sup>H NMR Spectrum of Compound 1 (400MHz, CDCl<sub>3</sub>)**

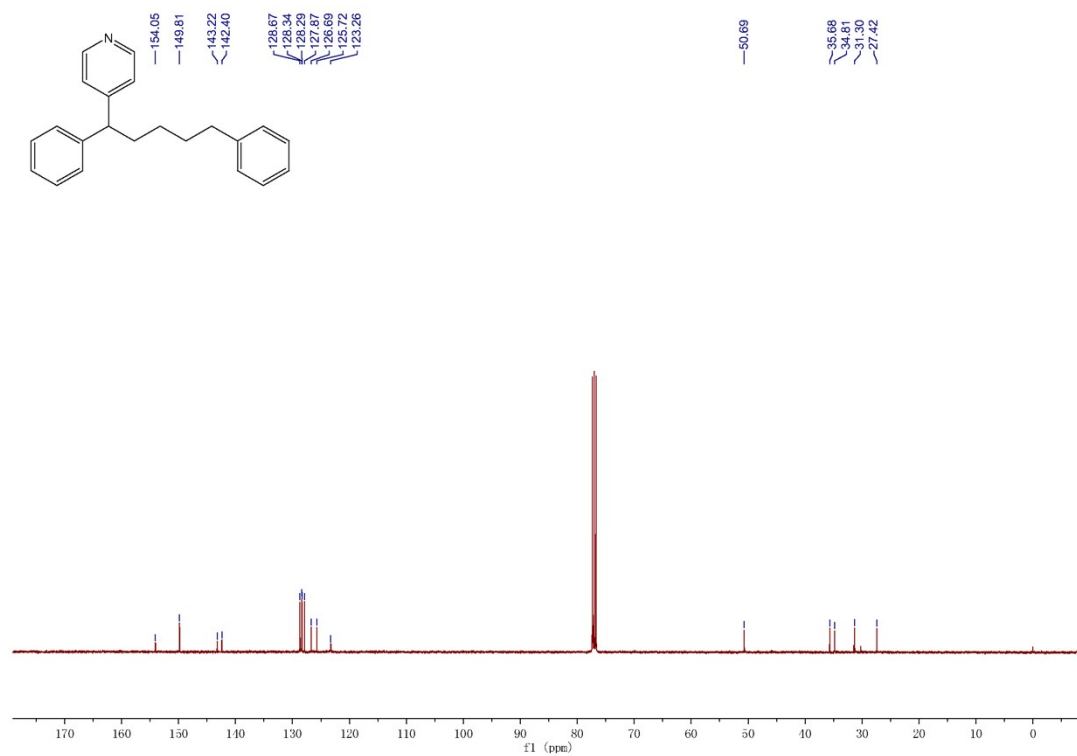

**<sup>13</sup>C NMR Spectrum of Compound 1 (100MHz, CDCl<sub>3</sub>)**

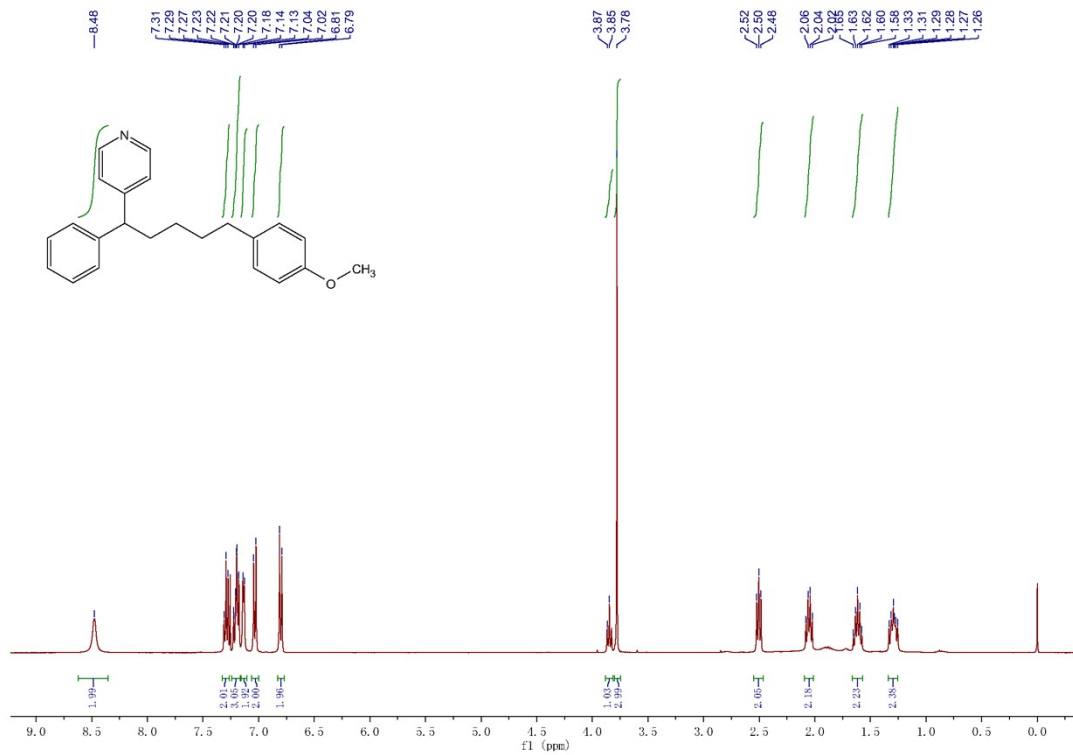

**<sup>1</sup>H NMR Spectrum of Compound 2 (400MHz, CDCl<sub>3</sub>)**

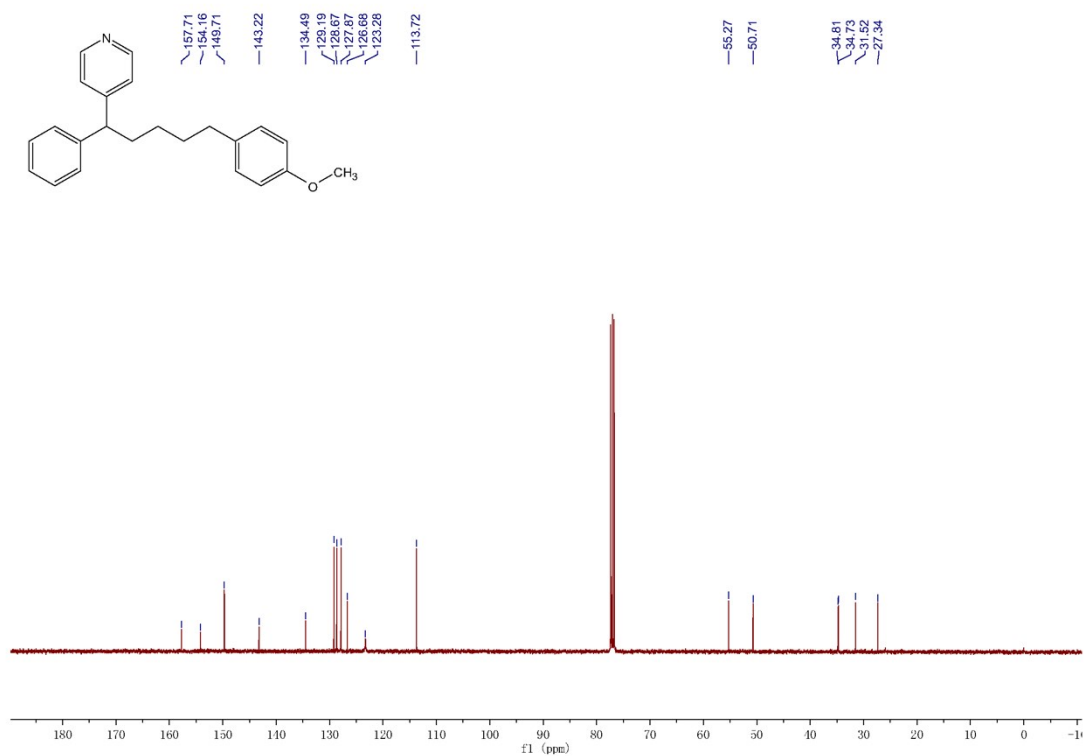

**<sup>13</sup>C NMR Spectrum of Compound 2 (100MHz, CDCl<sub>3</sub>)**

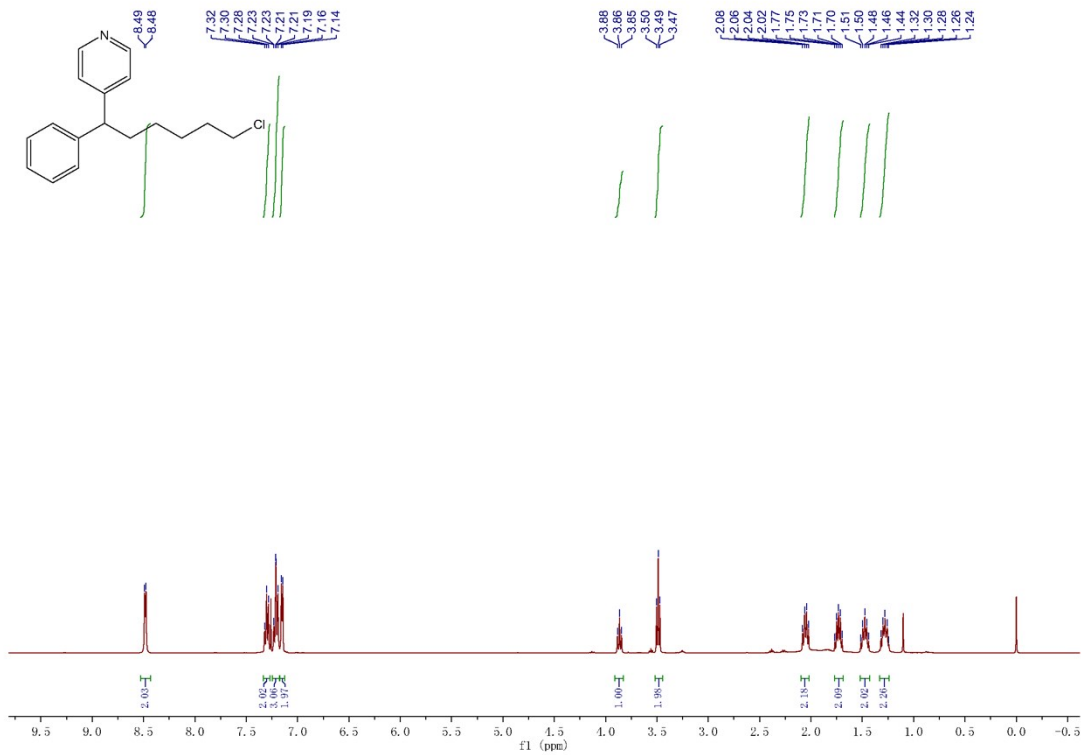

**<sup>1</sup>H NMR Spectrum of Compound 3 (400MHz, CDCl<sub>3</sub>)**

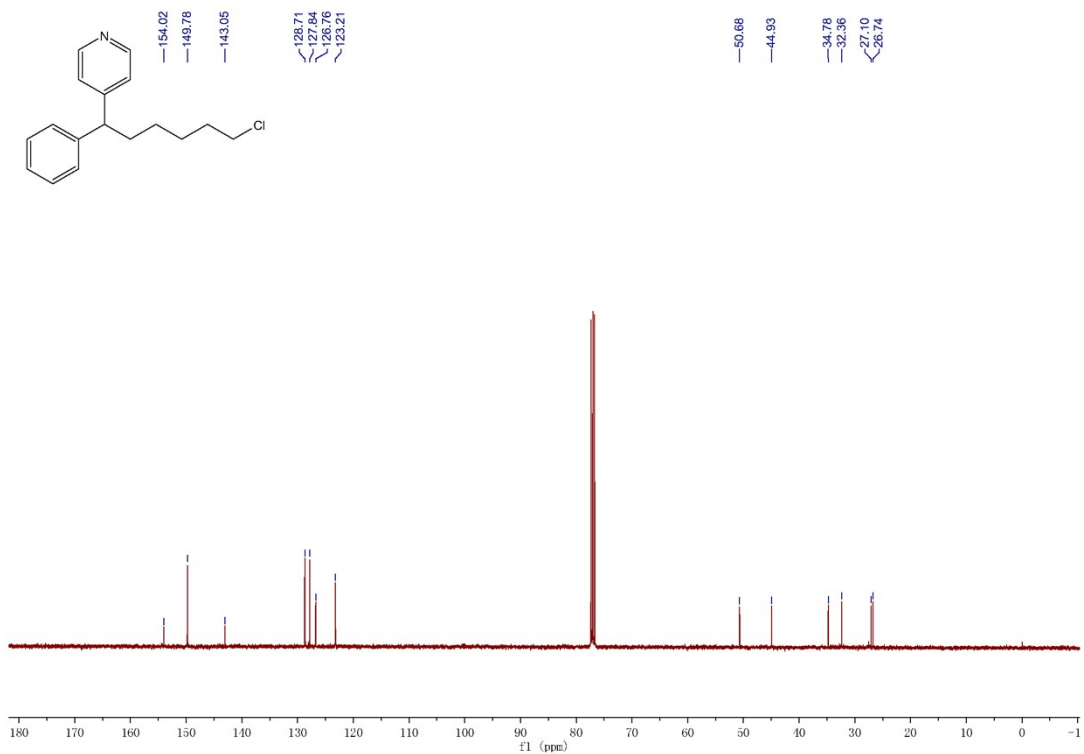

**<sup>13</sup>C NMR Spectrum of Compound 3 (100MHz, CDCl<sub>3</sub>)**

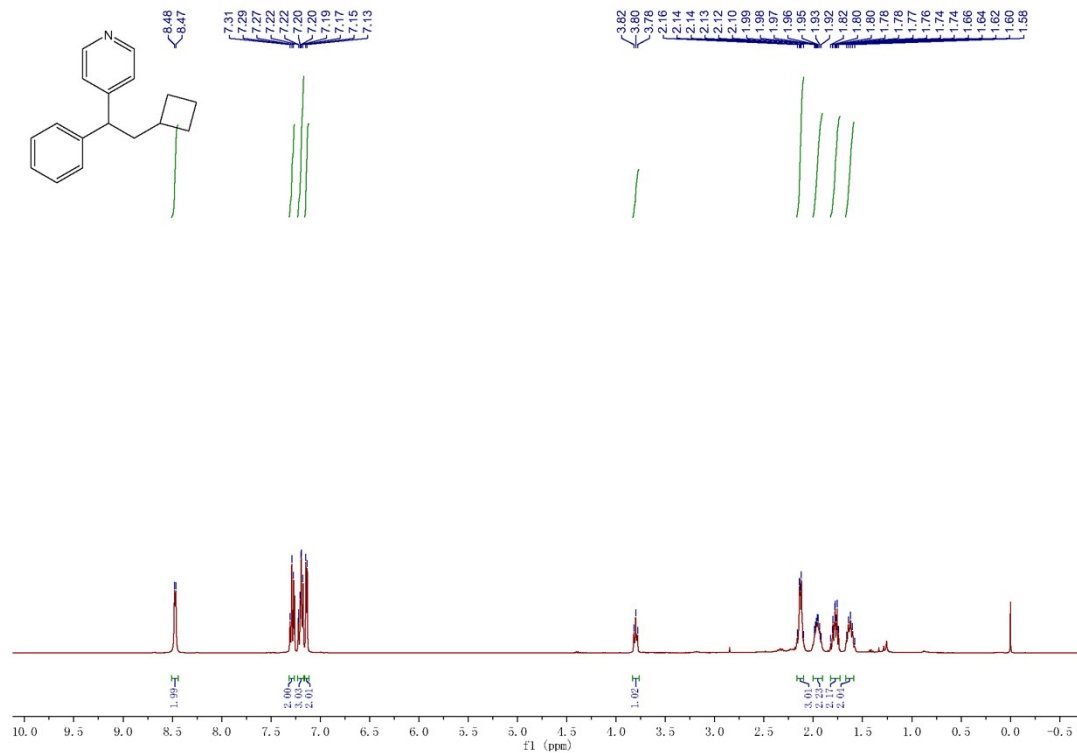

**<sup>1</sup>H NMR Spectrum of Compound 4 (400MHz, CDCl<sub>3</sub>)**

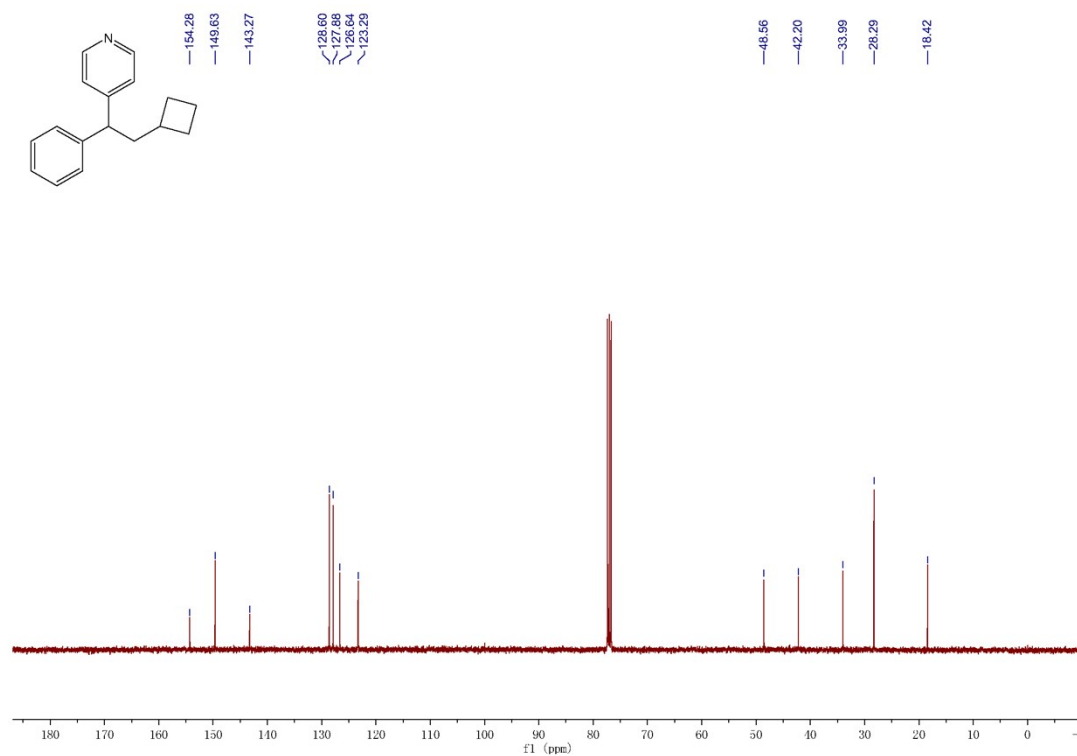

**<sup>13</sup>C NMR Spectrum of Compound 4 (100MHz, CDCl<sub>3</sub>)**

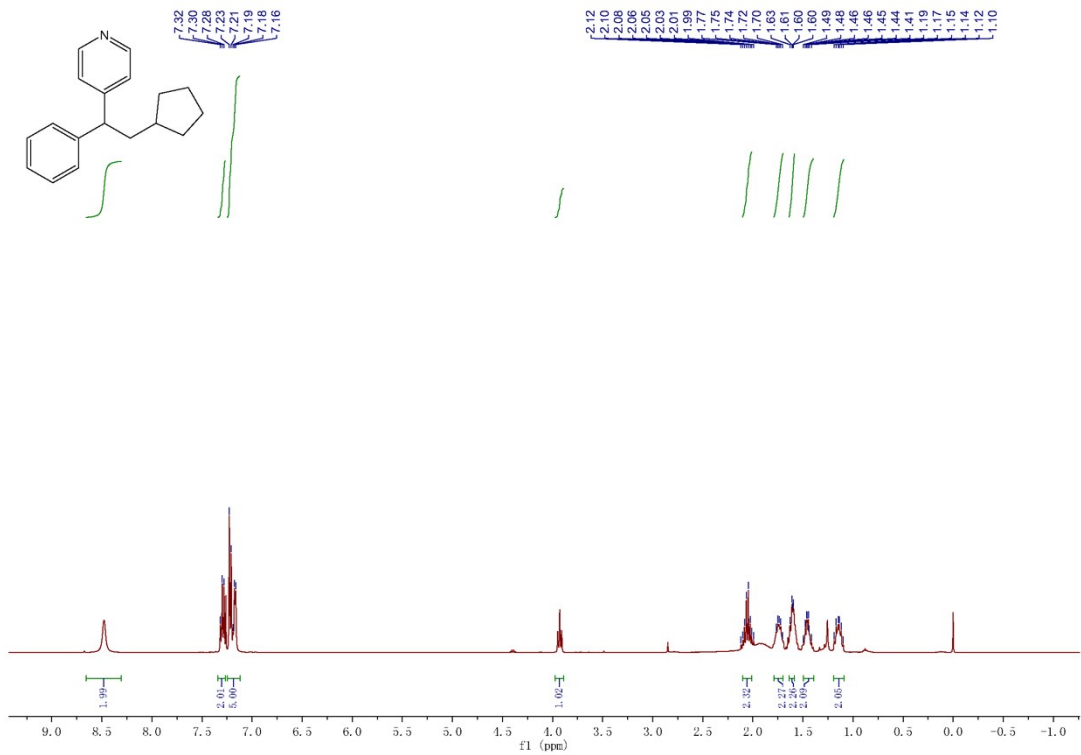

**<sup>1</sup>H NMR Spectrum of Compound 5 (400MHz, CDCl<sub>3</sub>)**

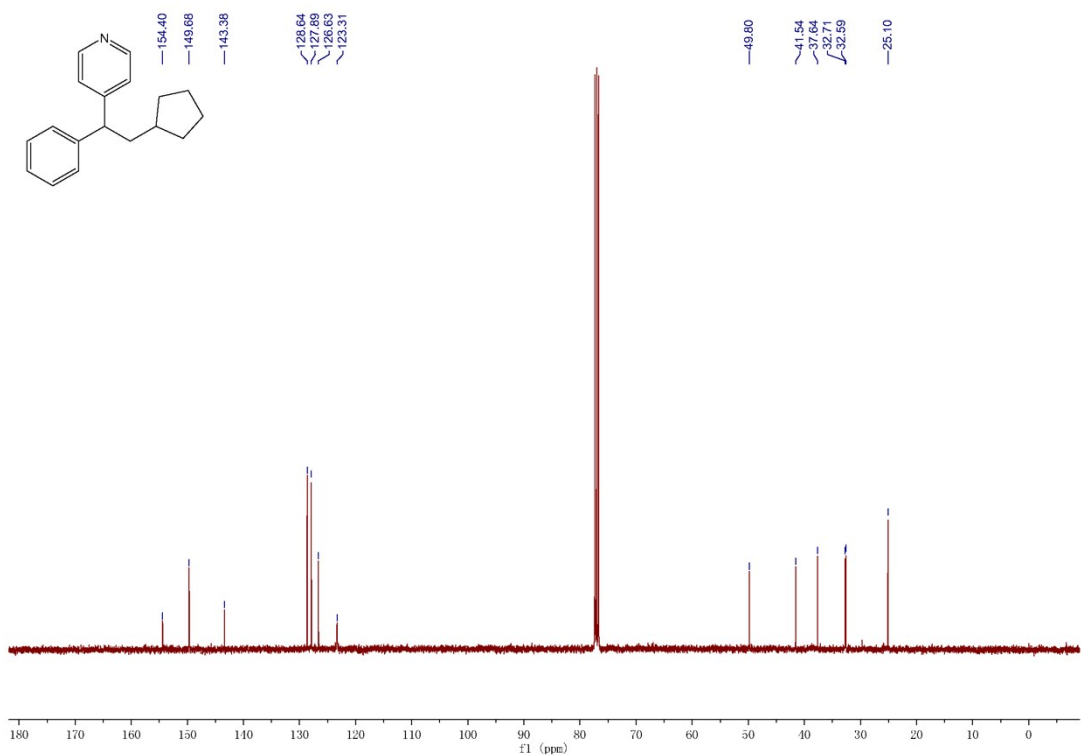

**<sup>13</sup>C NMR Spectrum of Compound 5 (100MHz, CDCl<sub>3</sub>)**

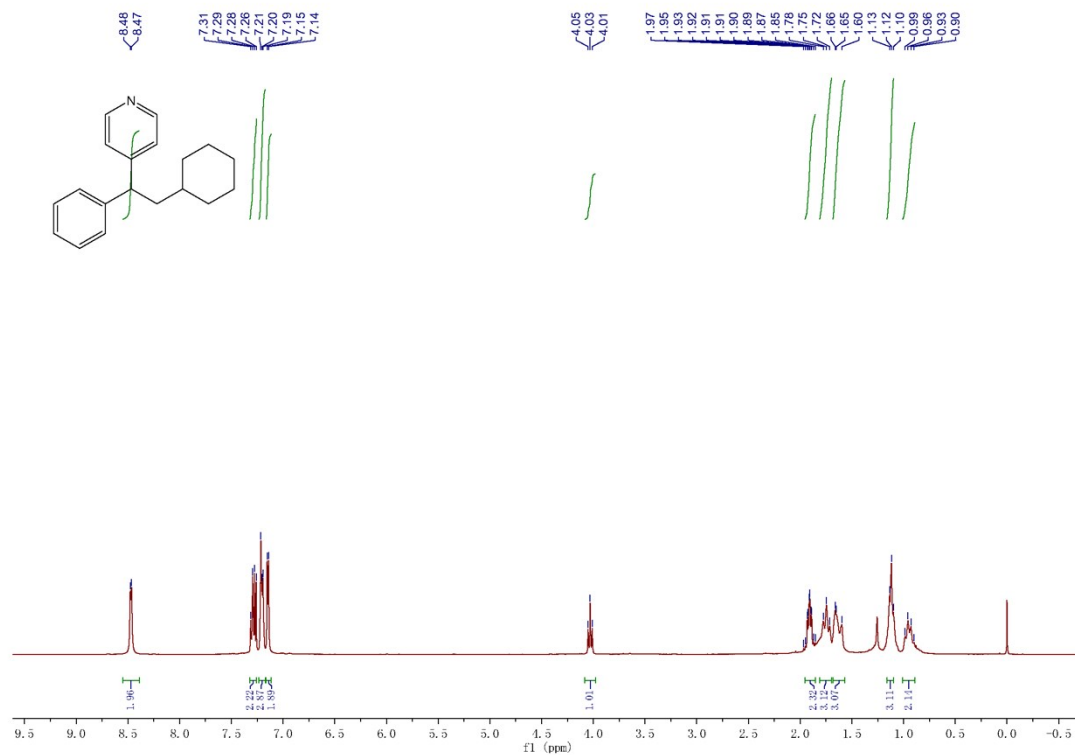

**<sup>1</sup>H NMR Spectrum of Compound 6 (400MHz, CDCl<sub>3</sub>)**

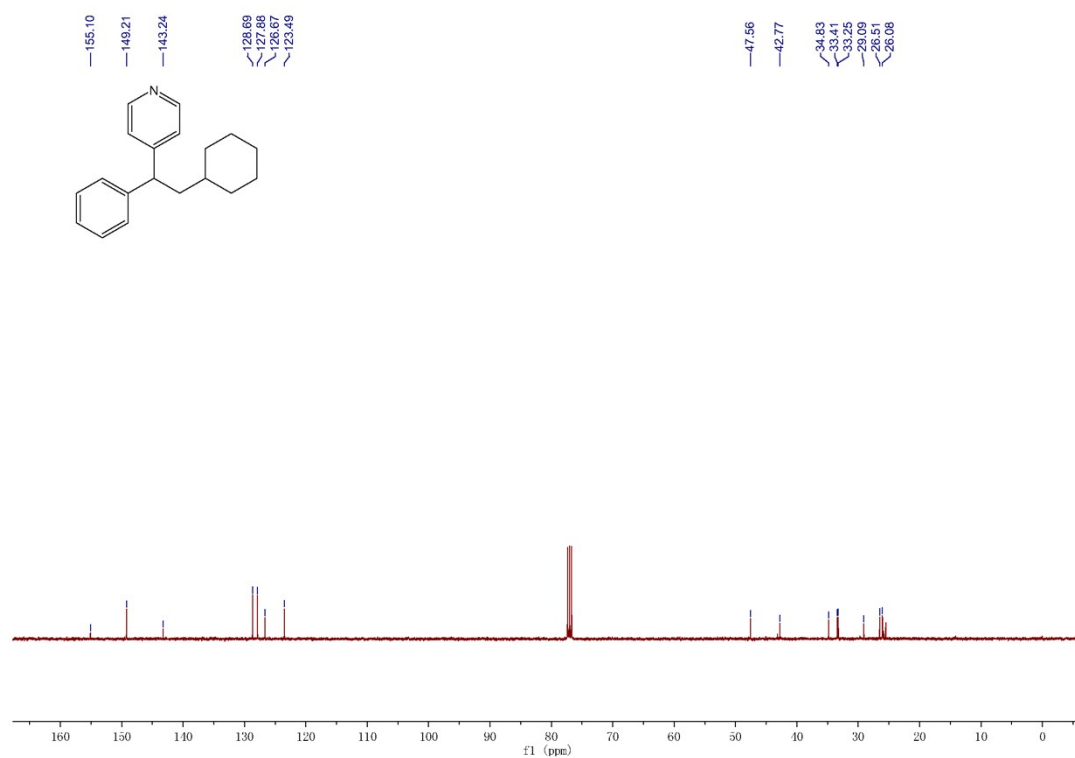

**<sup>13</sup>C NMR Spectrum of Compound 6 (100MHz, CDCl<sub>3</sub>)**



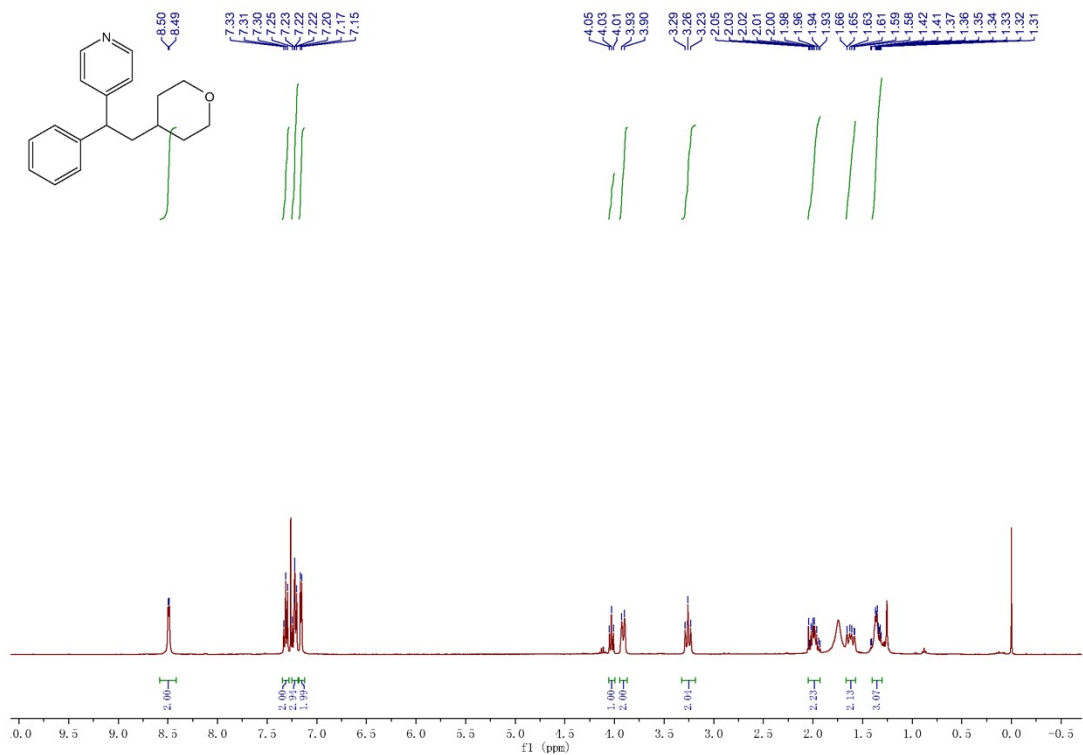

**<sup>1</sup>H NMR Spectrum of Compound 7 (400MHz, CDCl<sub>3</sub>)**

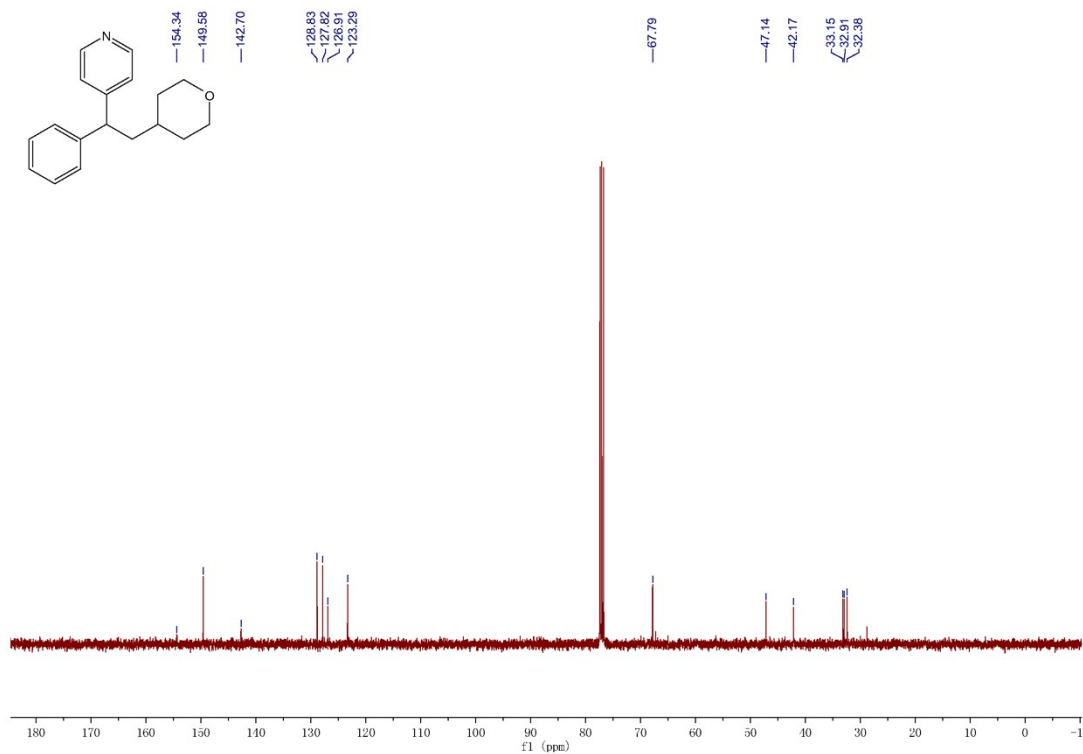

**<sup>13</sup>C NMR Spectrum of Compound 7 (100MHz, CDCl<sub>3</sub>)**

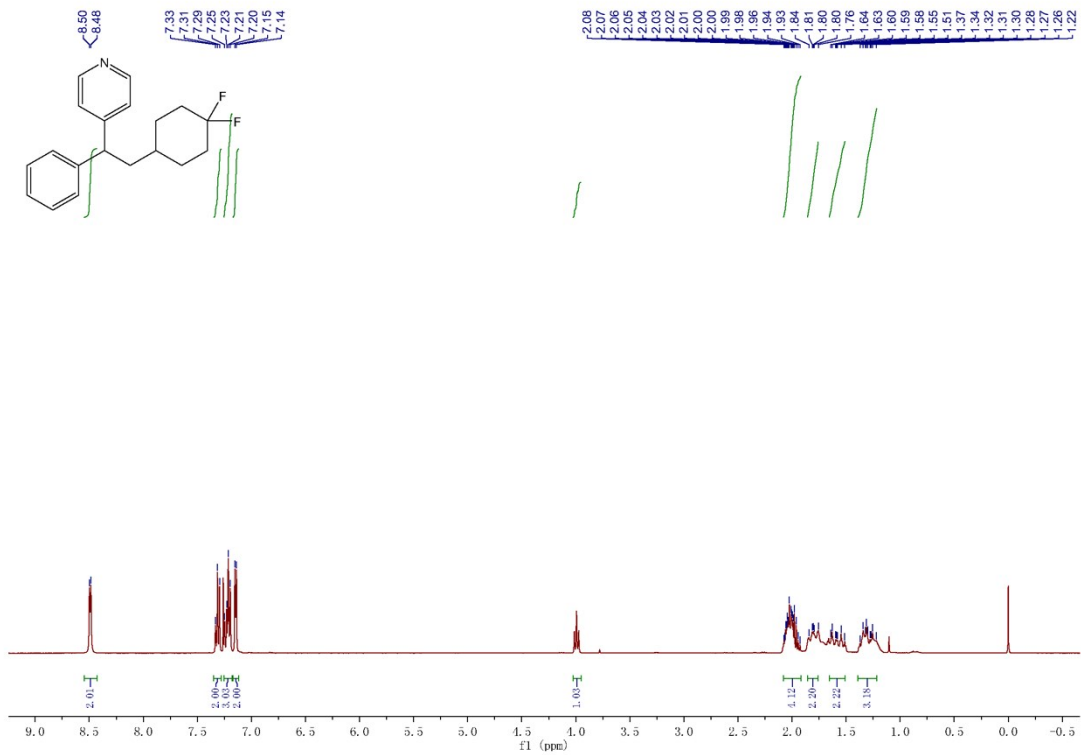

<sup>1</sup>H NMR Spectrum of Compound 8 (400MHz, CDCl<sub>3</sub>)

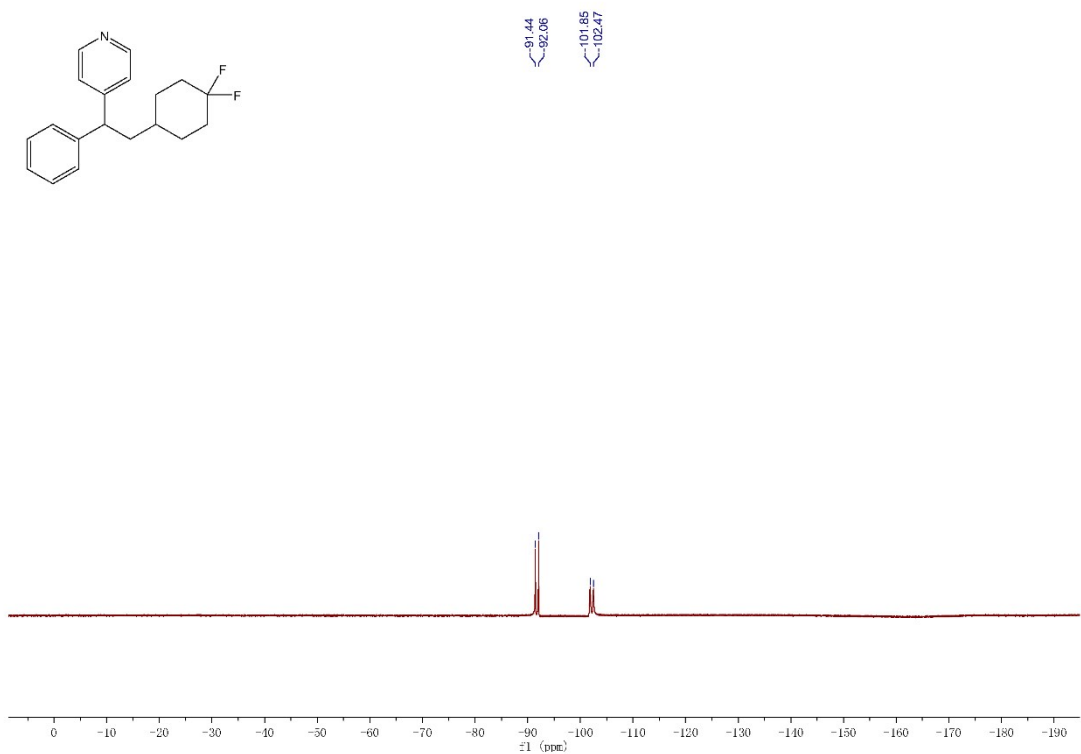

<sup>19</sup>F NMR Spectrum of Compound 8 (377MHz, CDCl<sub>3</sub>)

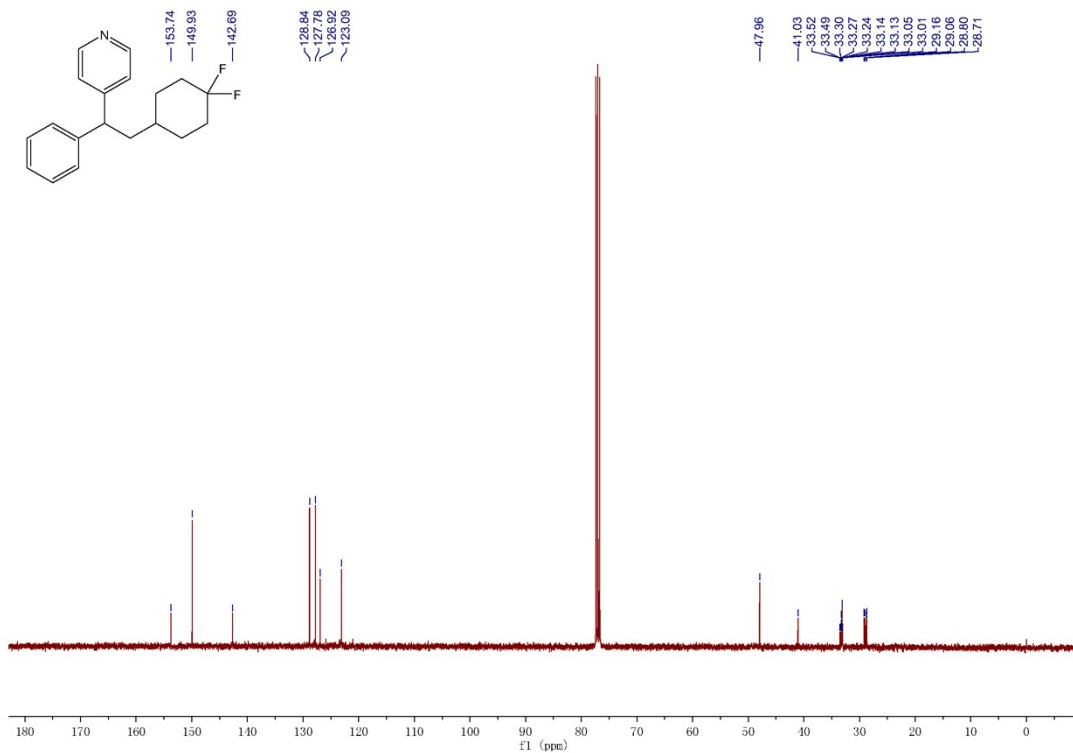

<sup>13</sup>C NMR Spectrum of Compound 8 (100MHz, CDCl<sub>3</sub>)

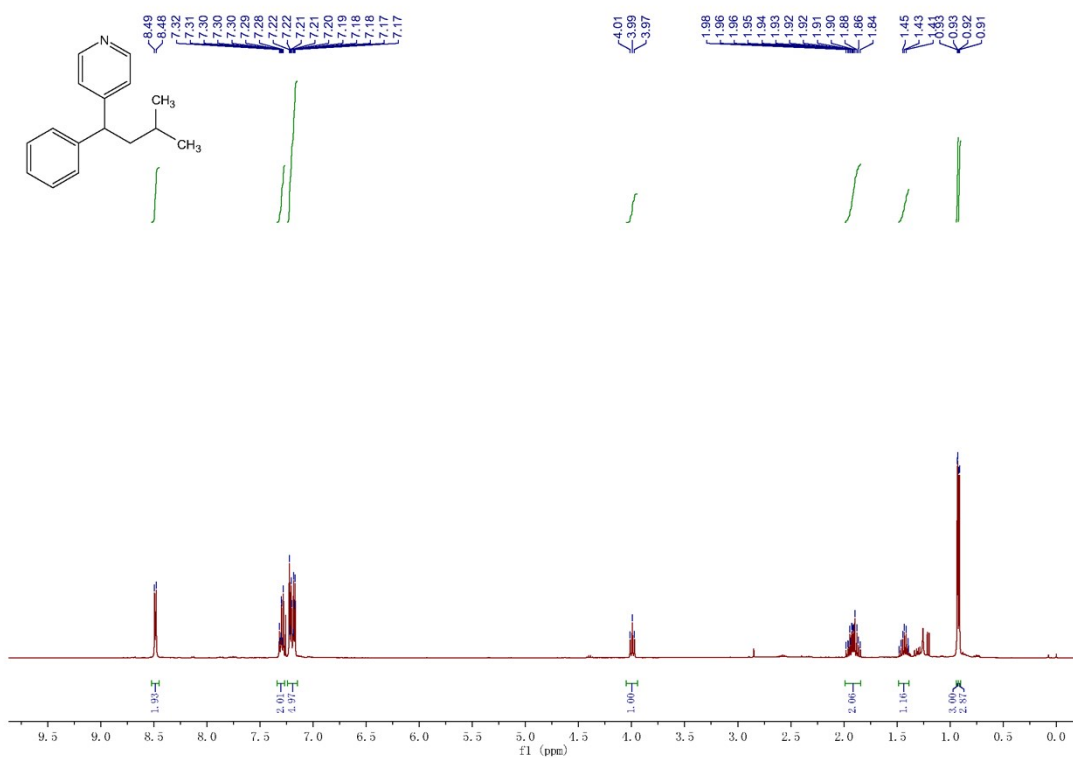

<sup>1</sup>H NMR Spectrum of Compound 9 (400MHz, CDCl<sub>3</sub>)

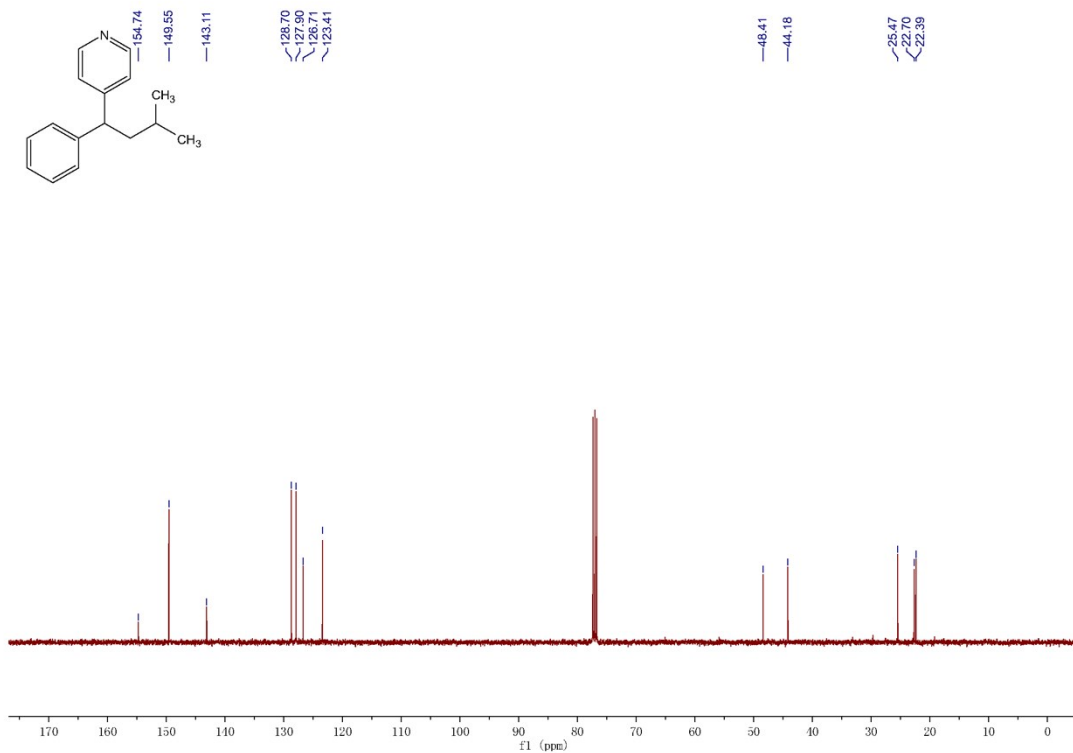

<sup>13</sup>C NMR Spectrum of Compound 9 (100MHz, CDCl<sub>3</sub>)

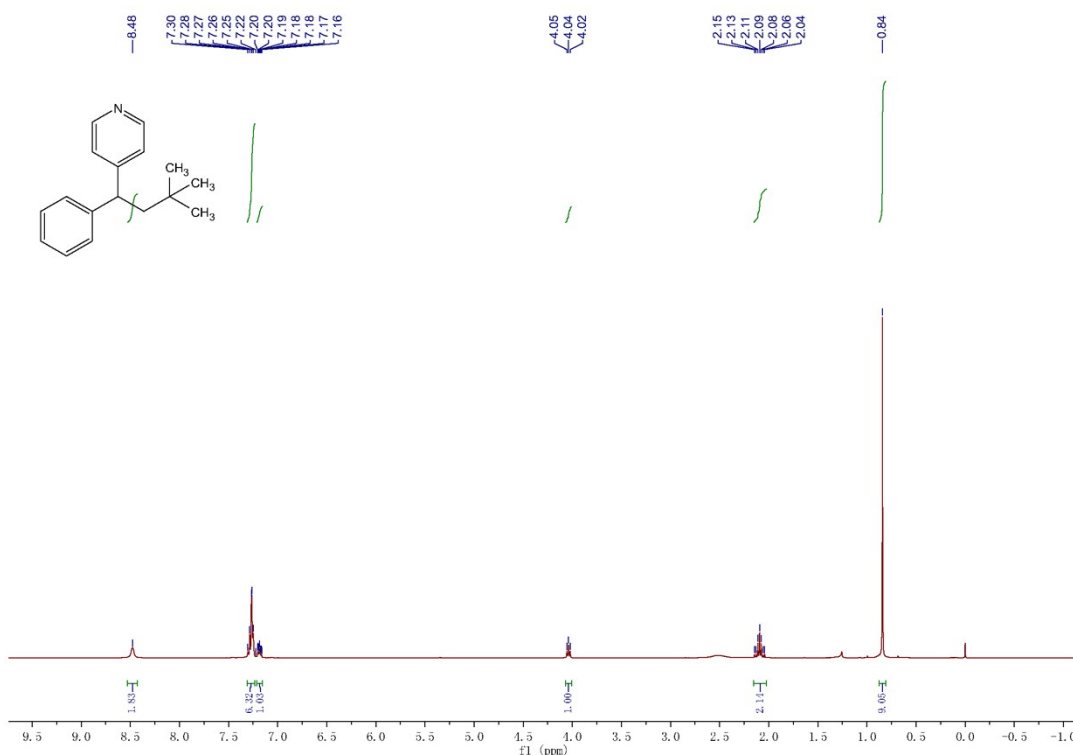

<sup>1</sup>H NMR Spectrum of Compound 10 (400MHz, CDCl<sub>3</sub>)

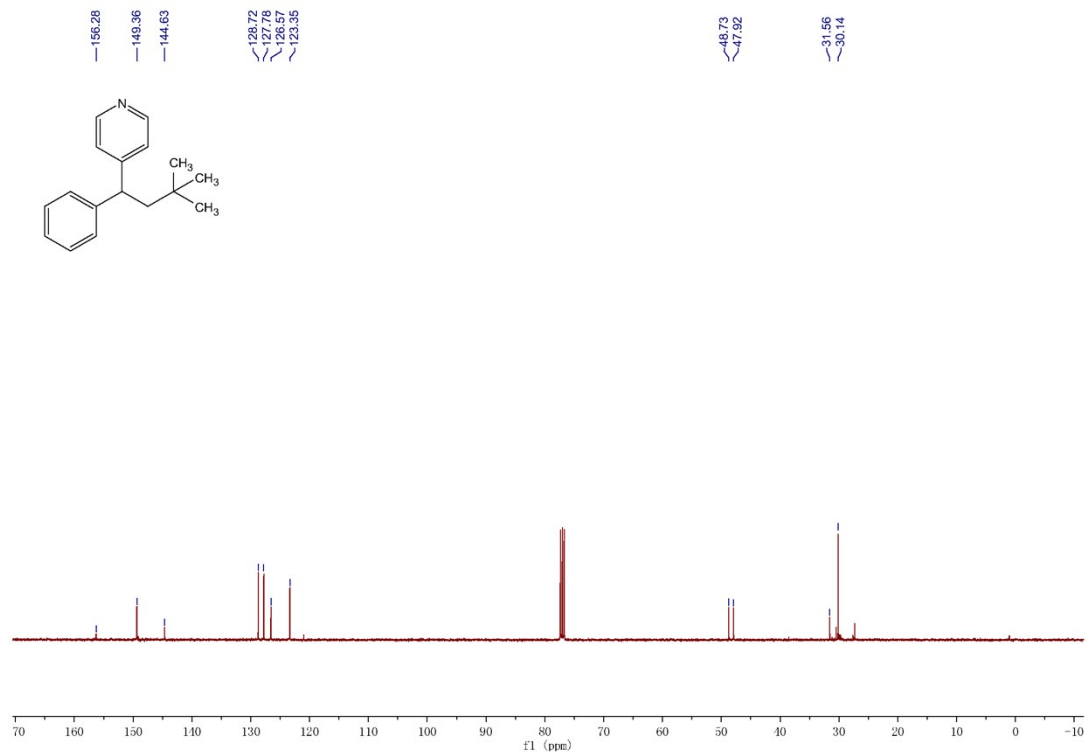

<sup>13</sup>C NMR Spectrum of Compound 10 (100MHz, CDCl<sub>3</sub>)

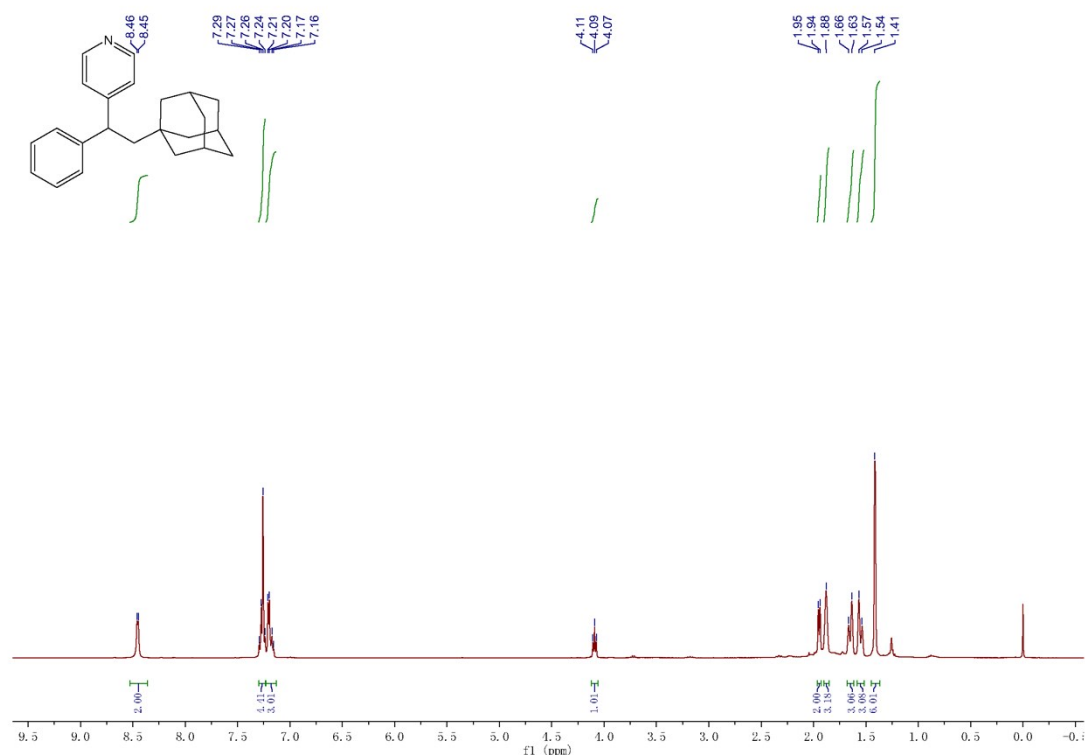

<sup>1</sup>H NMR Spectrum of Compound 11 (400MHz, CDCl<sub>3</sub>)

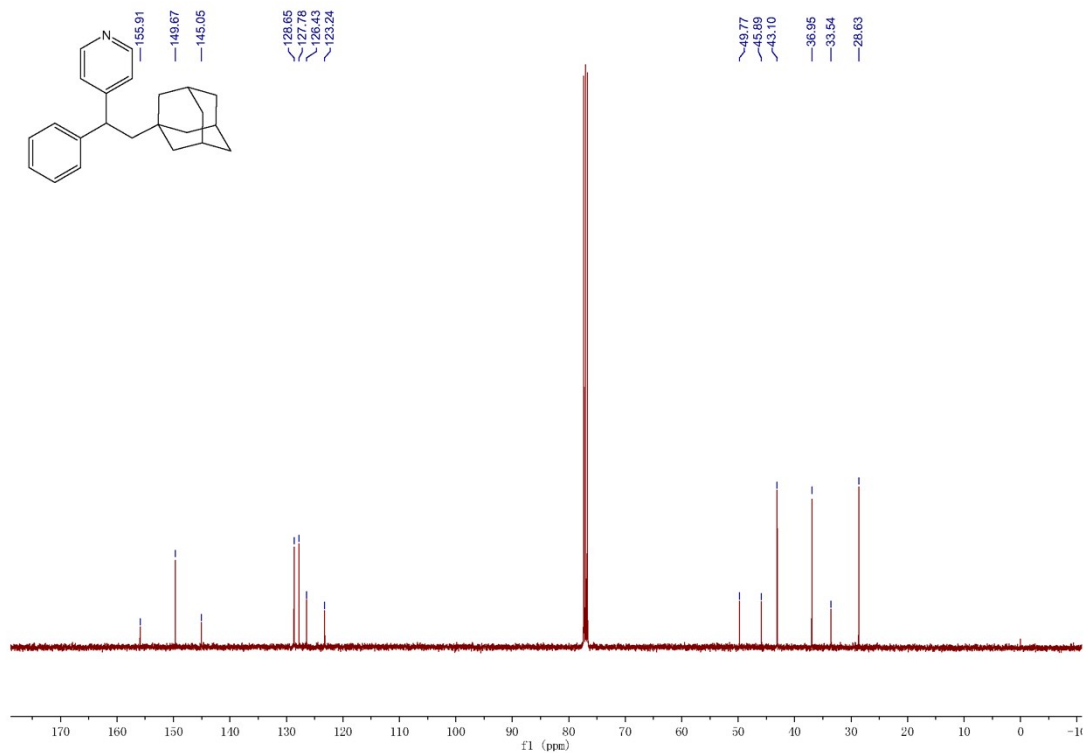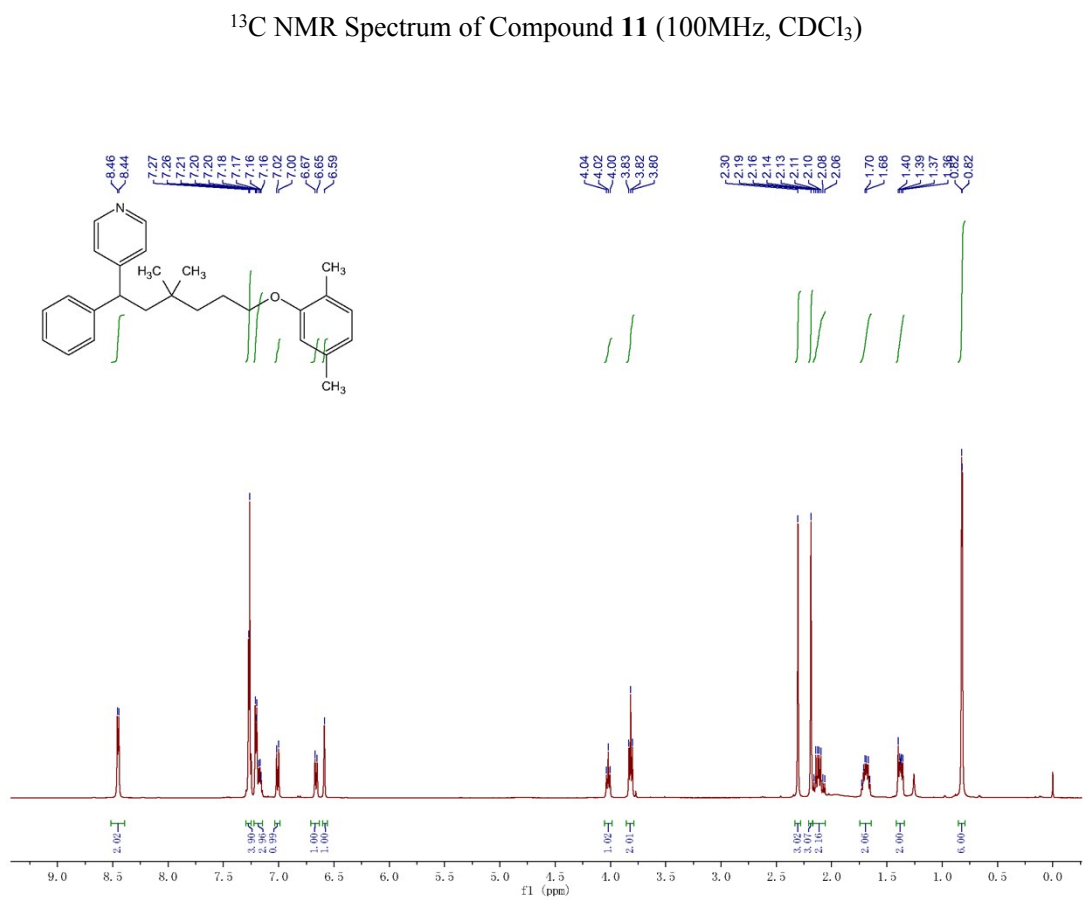

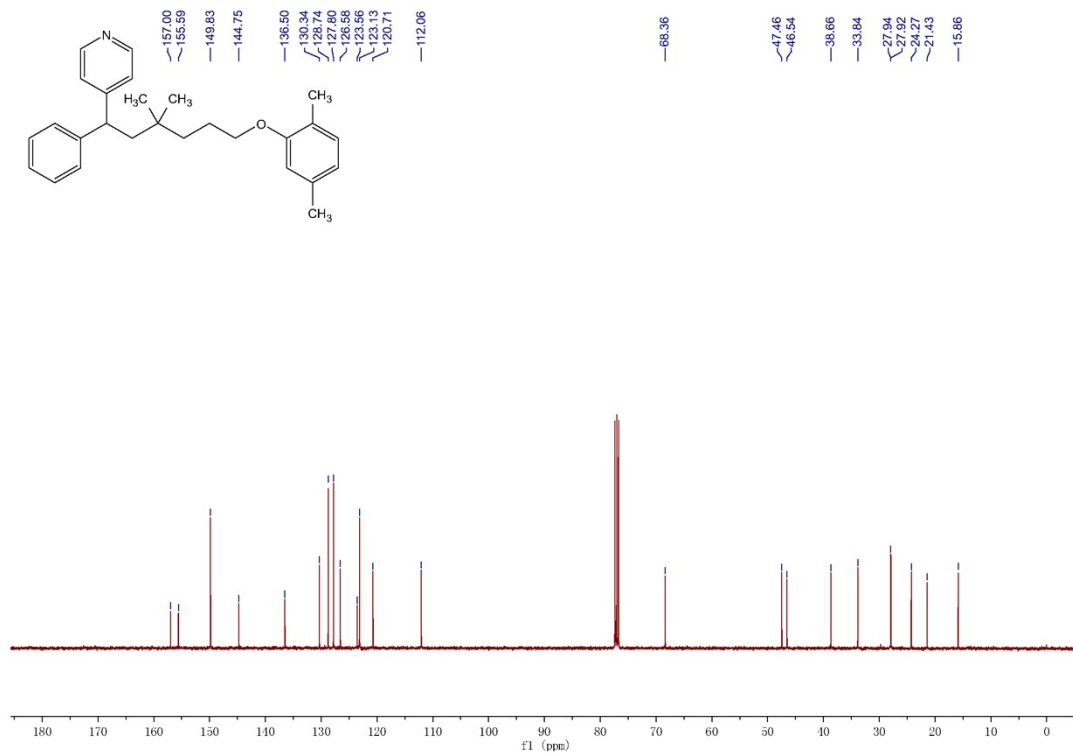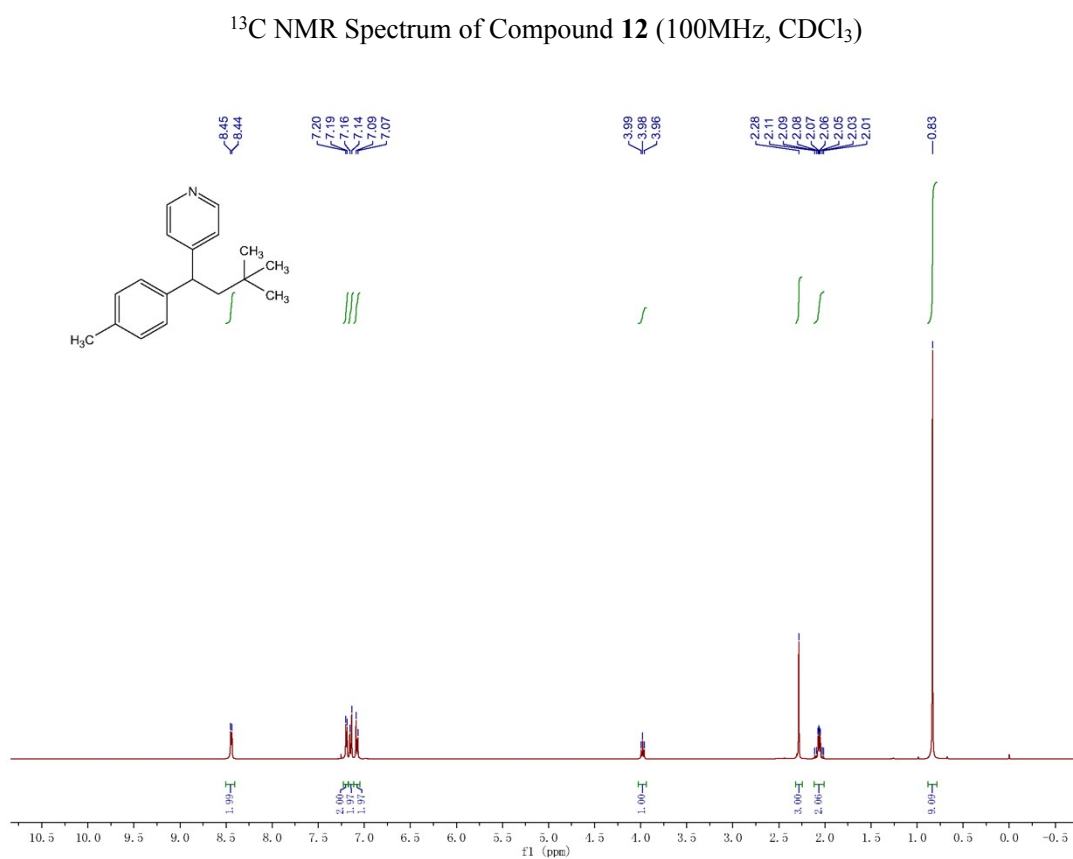

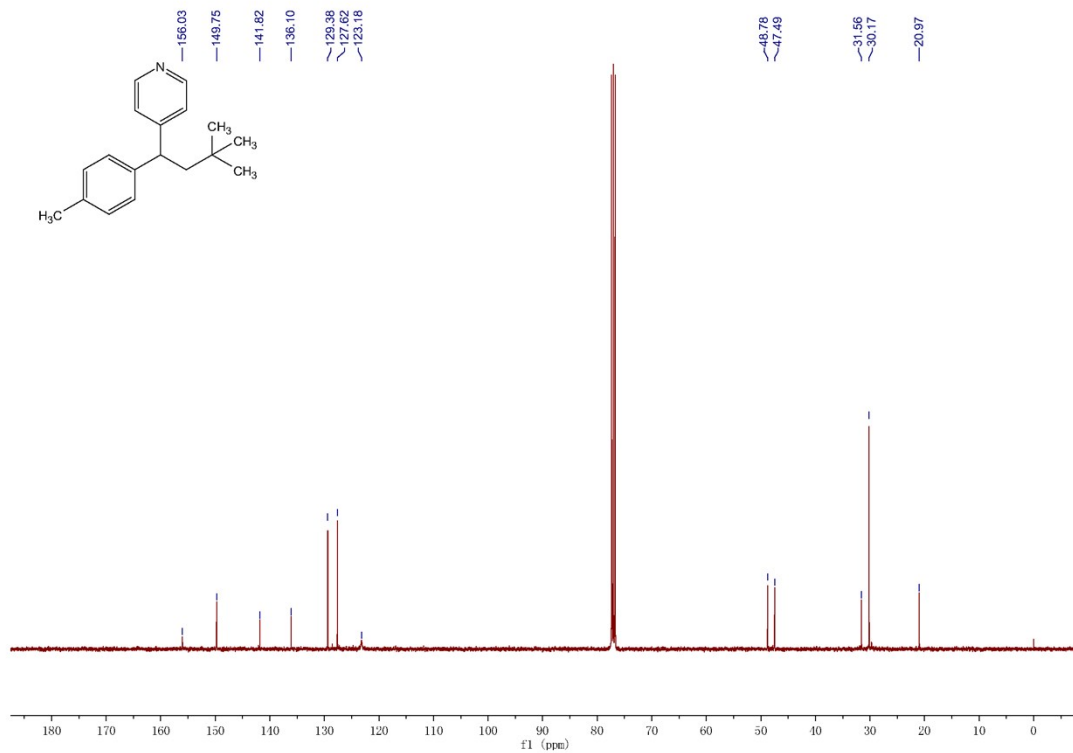

<sup>13</sup>C NMR Spectrum of Compound **13** (100MHz, CDCl<sub>3</sub>)

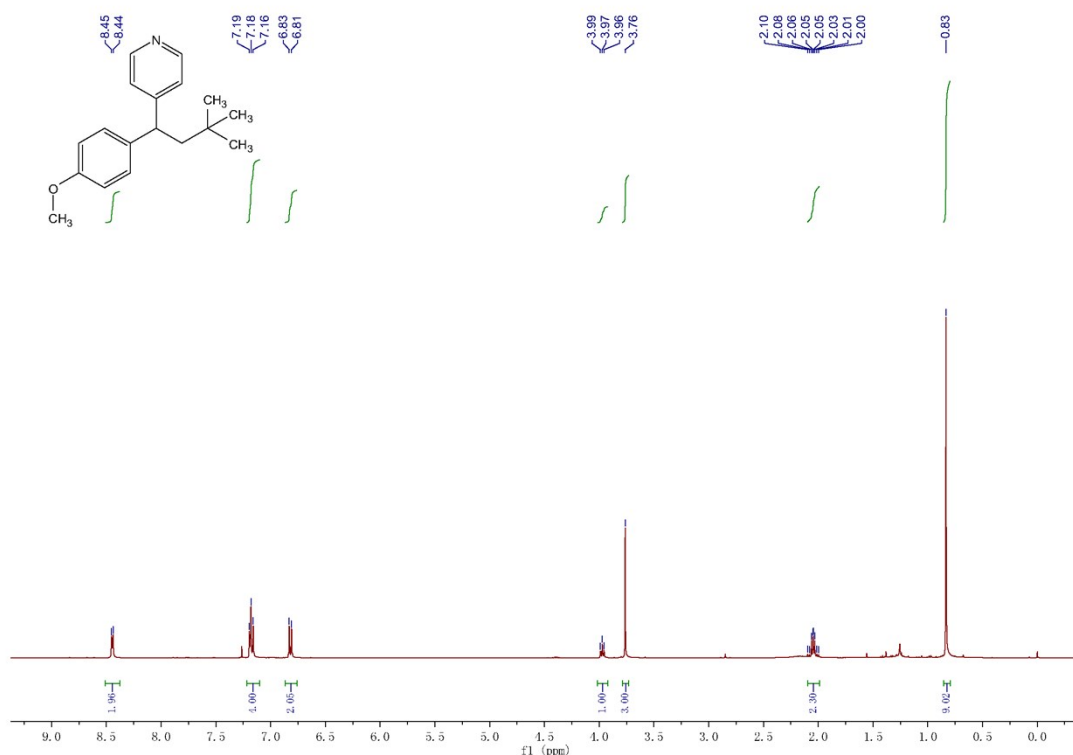

<sup>1</sup>H NMR Spectrum of Compound **14** (400MHz, CDCl<sub>3</sub>)



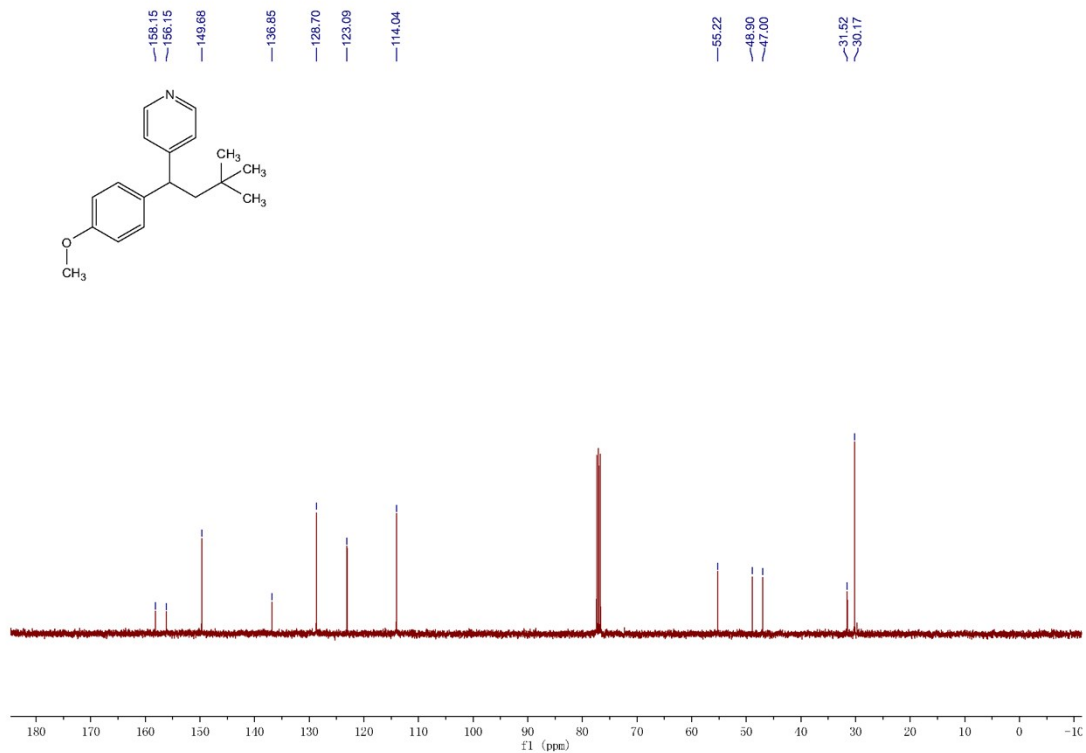

$^{13}\text{C}$  NMR Spectrum of Compound 14 (100MHz,  $\text{CDCl}_3$ )

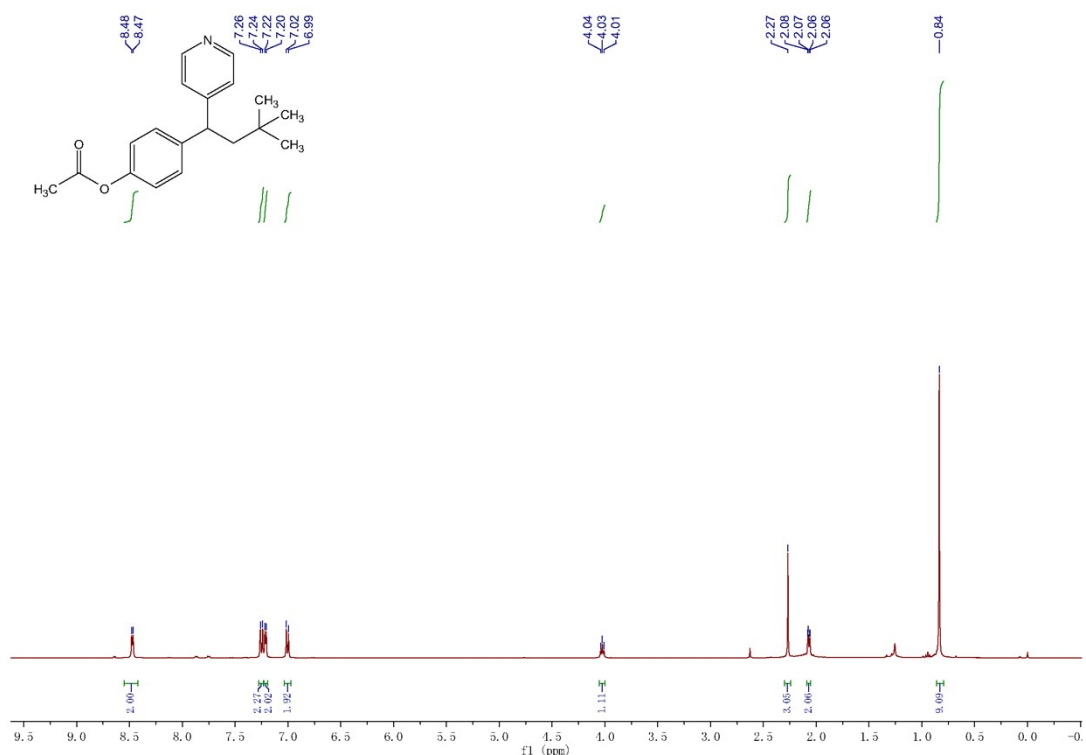

$^1\text{H}$  NMR Spectrum of Compound 15 (400MHz,  $\text{CDCl}_3$ )

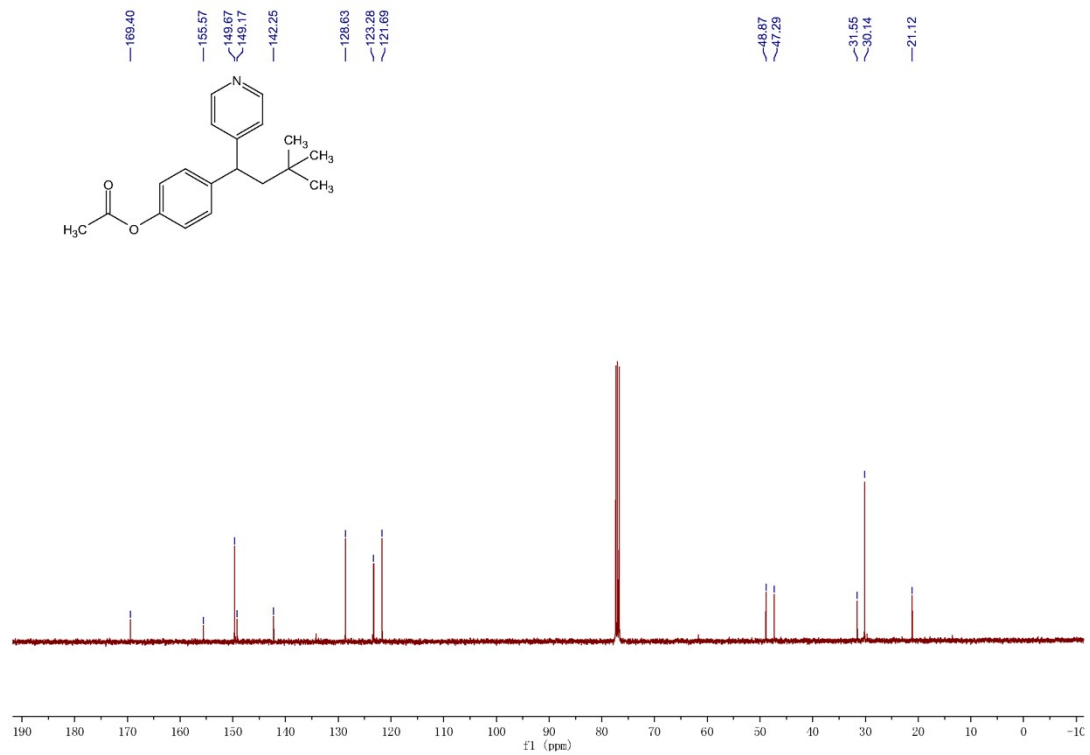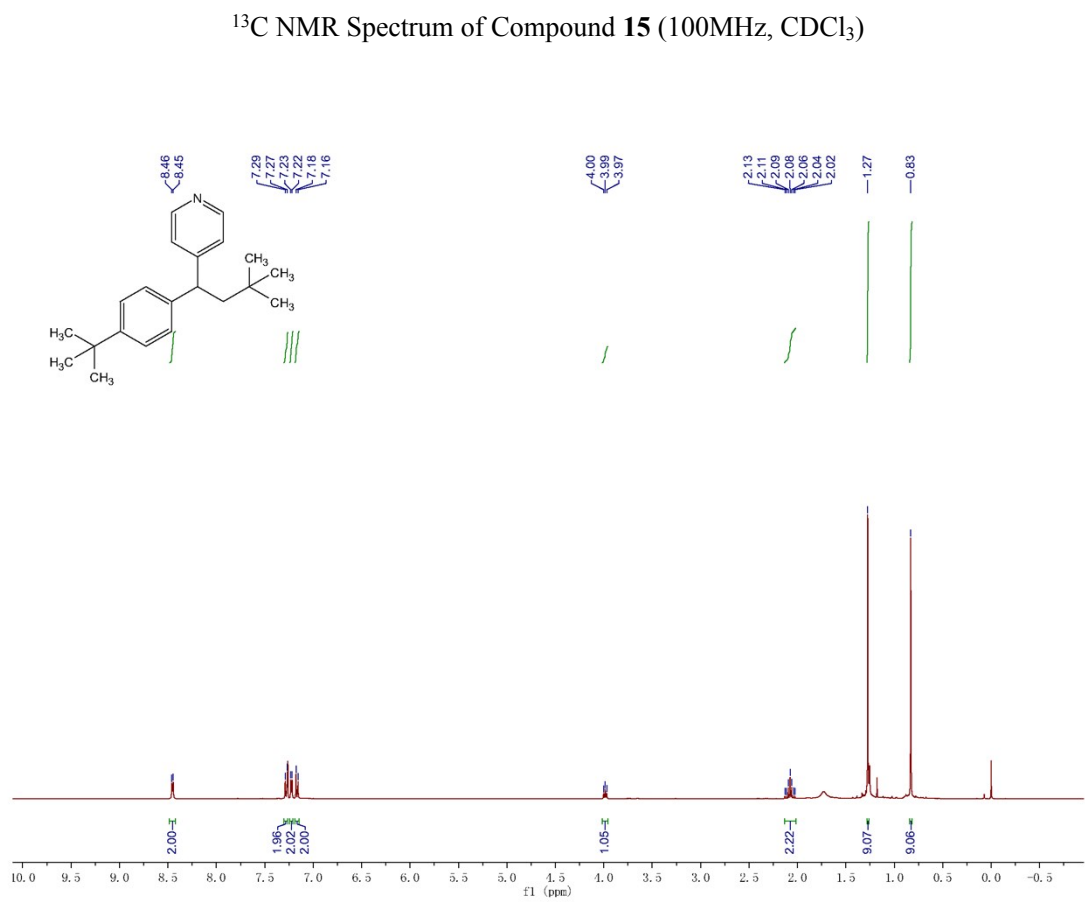

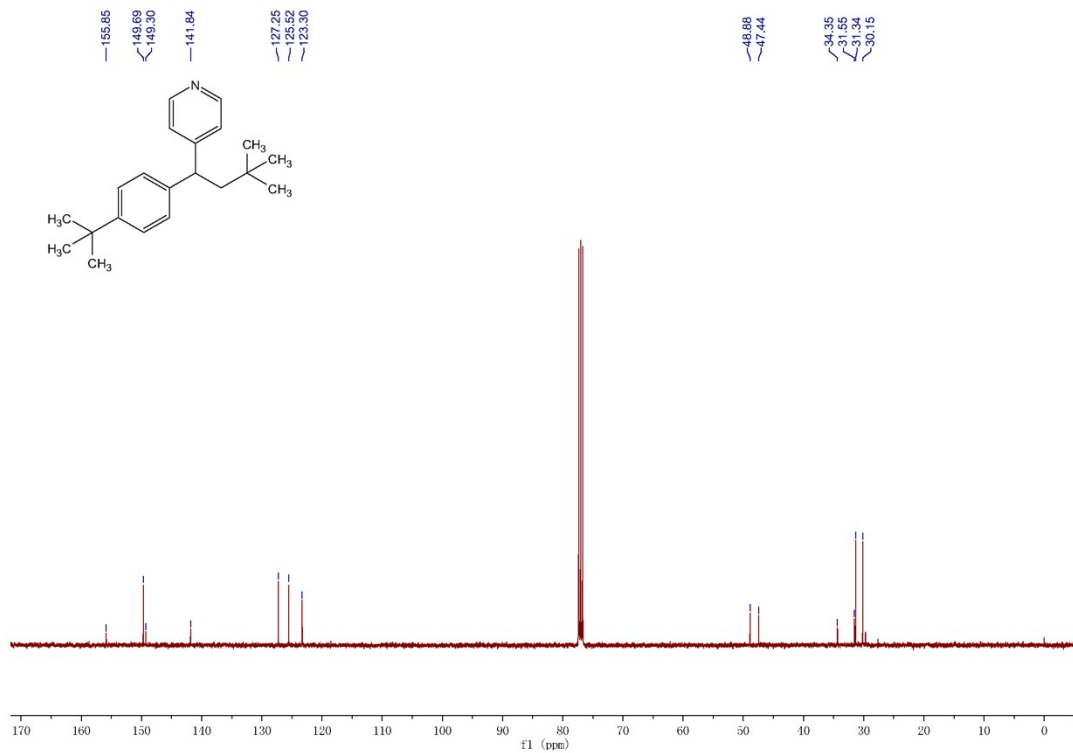

<sup>13</sup>C NMR Spectrum of Compound **16** (100MHz, CDCl<sub>3</sub>)

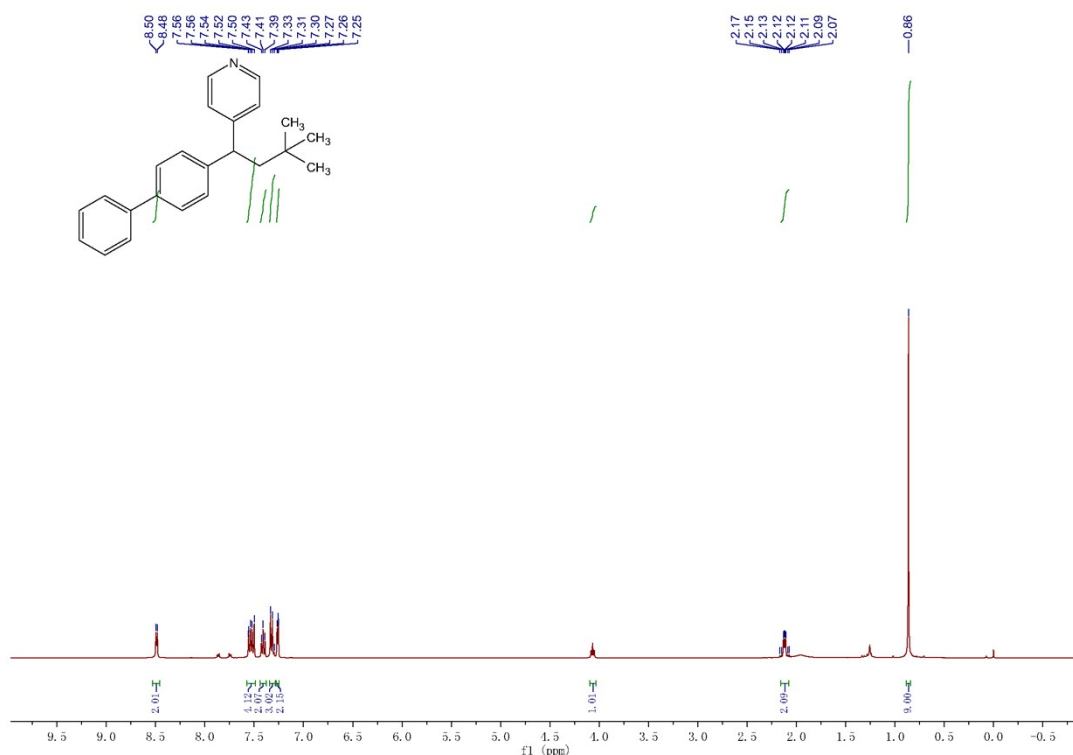

<sup>1</sup>H NMR Spectrum of Compound **17** (400MHz, CDCl<sub>3</sub>)

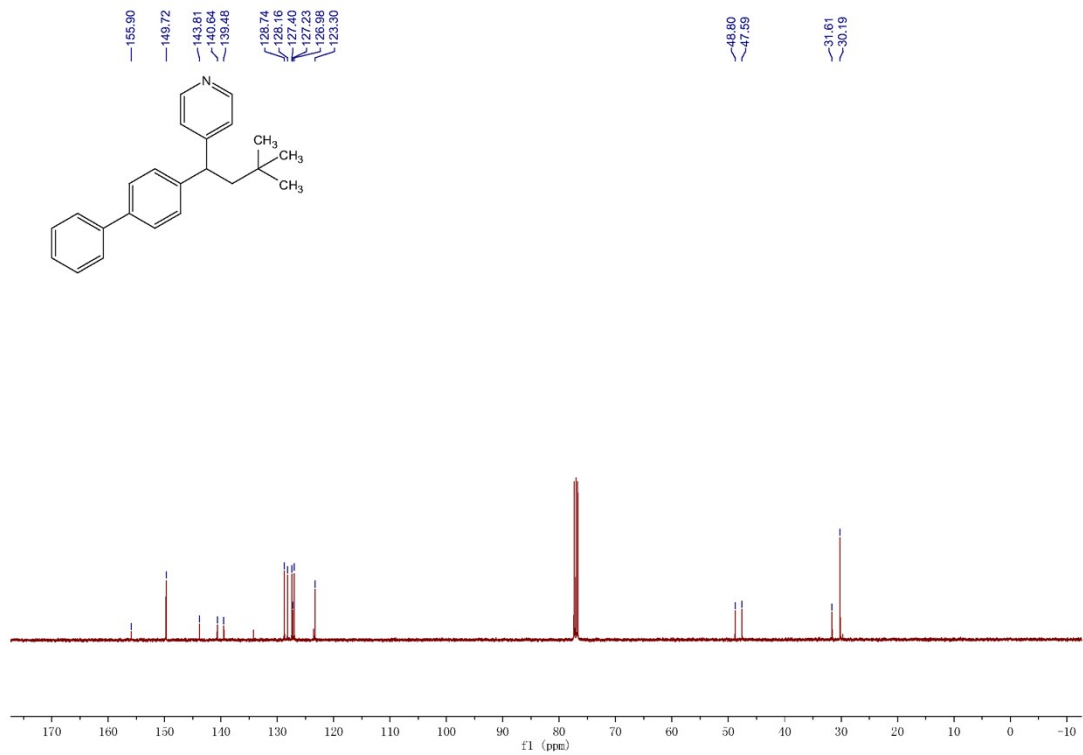

<sup>13</sup>C NMR Spectrum of Compound 17 (100MHz, CDCl<sub>3</sub>)

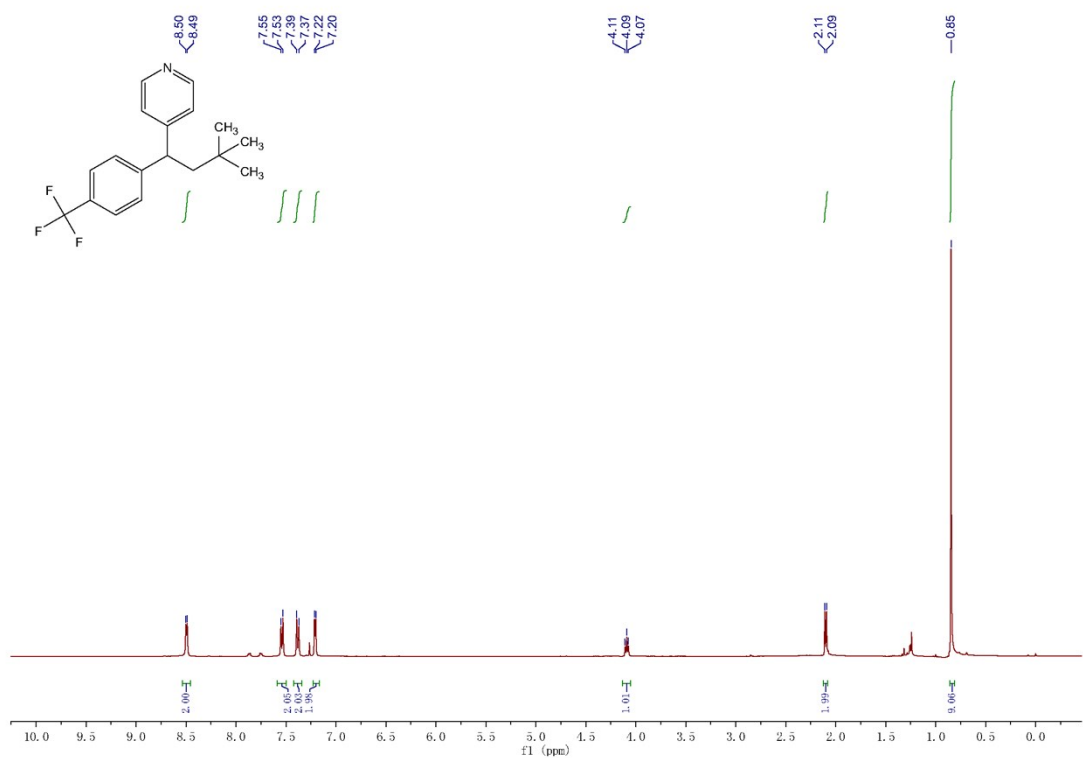

<sup>1</sup>H NMR Spectrum of Compound 18 (400MHz, CDCl<sub>3</sub>)

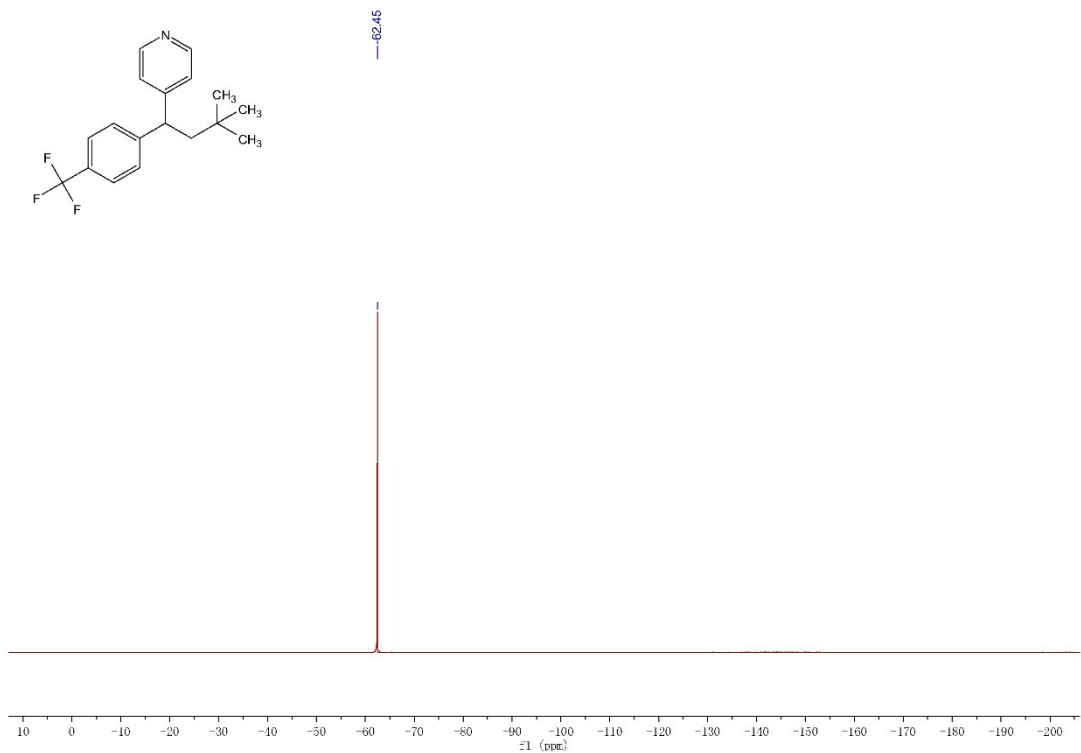

$^{19}\text{F}$  NMR Spectrum of Compound 18 (377MHz,  $\text{CDCl}_3$ )

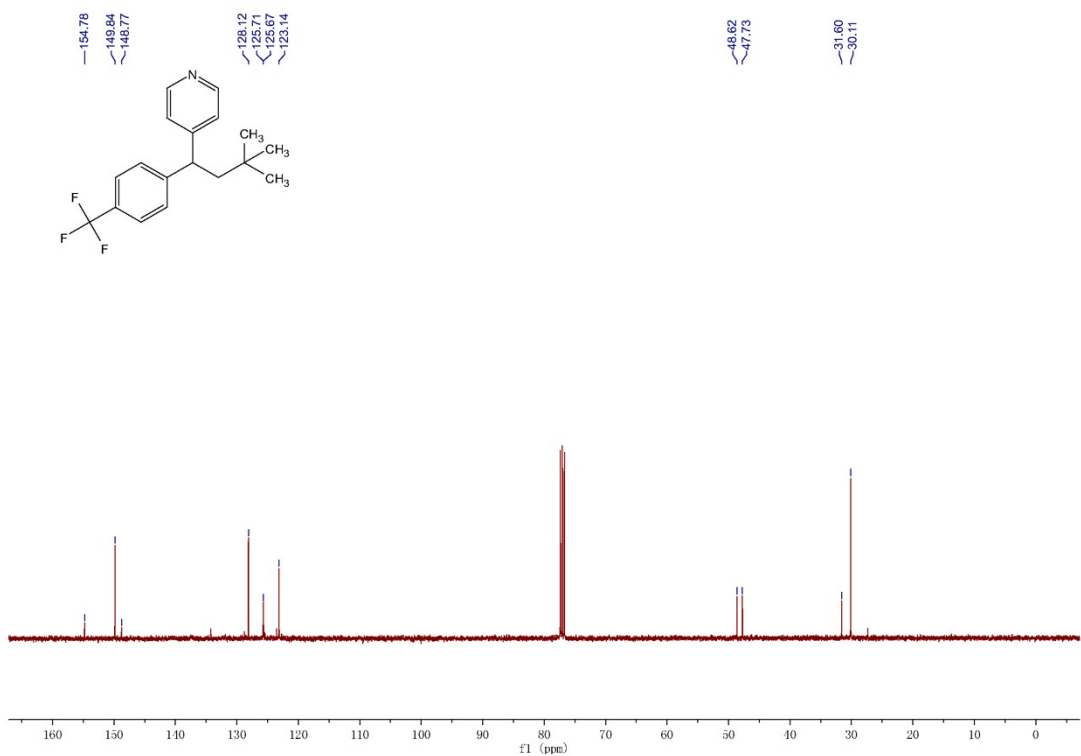

$^{13}\text{C}$  NMR Spectrum of Compound 18 (100MHz,  $\text{CDCl}_3$ )

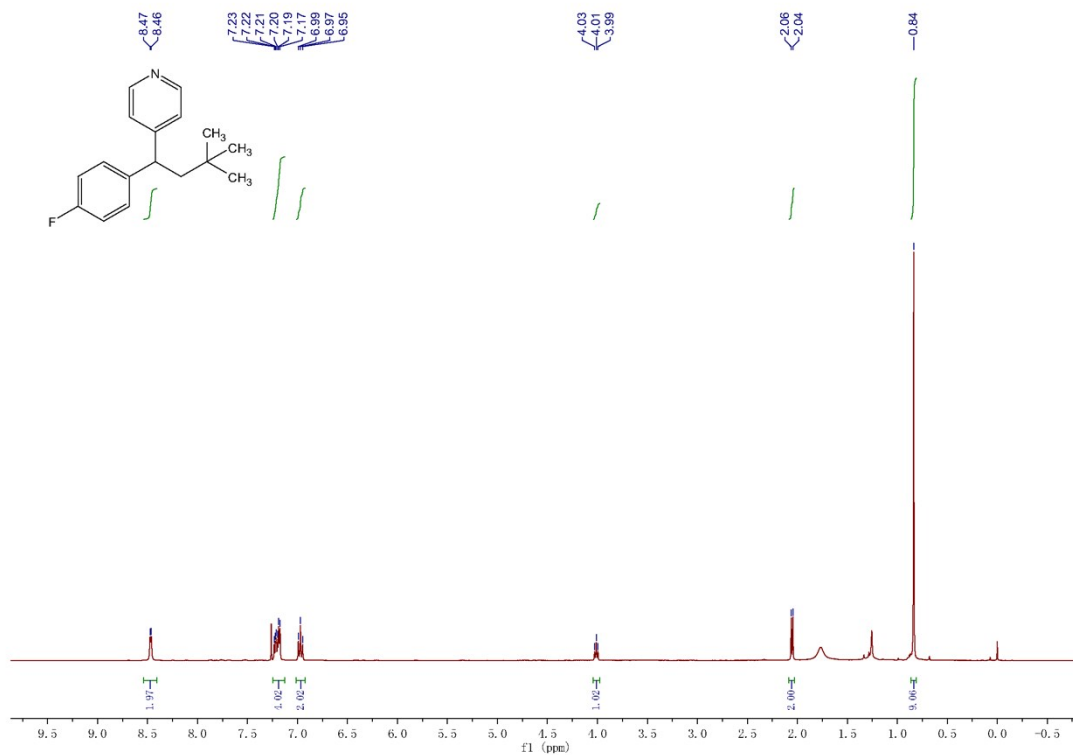

<sup>1</sup>H NMR Spectrum of Compound **19** (400MHz, CDCl<sub>3</sub>)

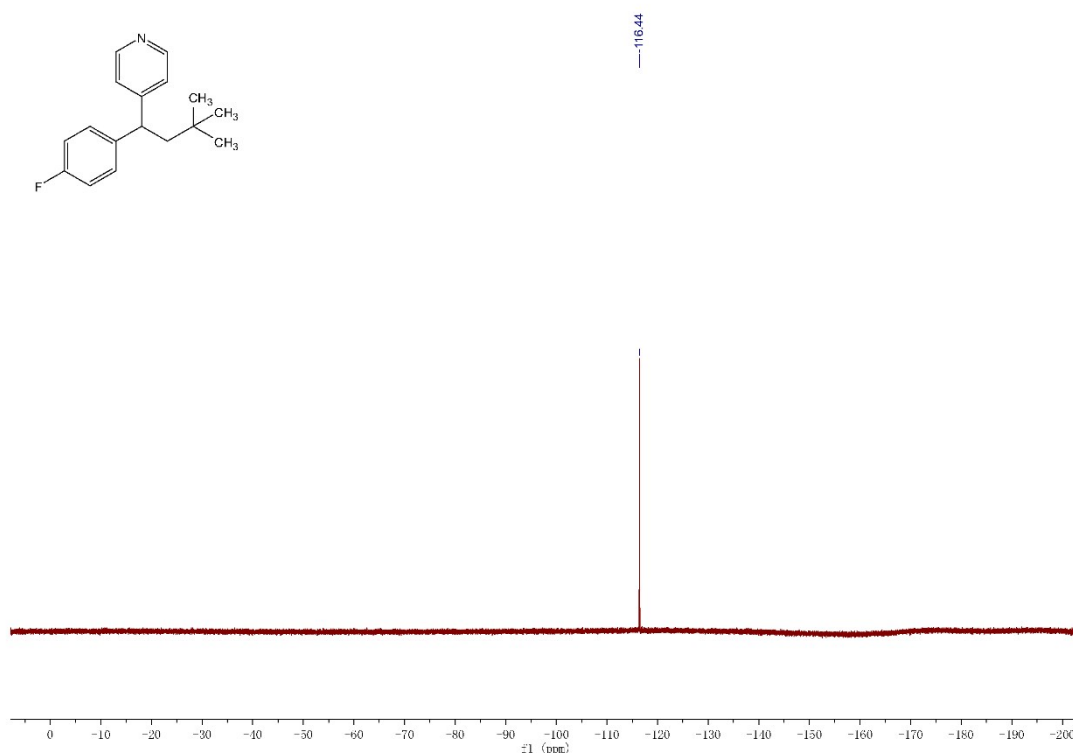

<sup>19</sup>F NMR Spectrum of Compound **19** (377MHz, CDCl<sub>3</sub>)

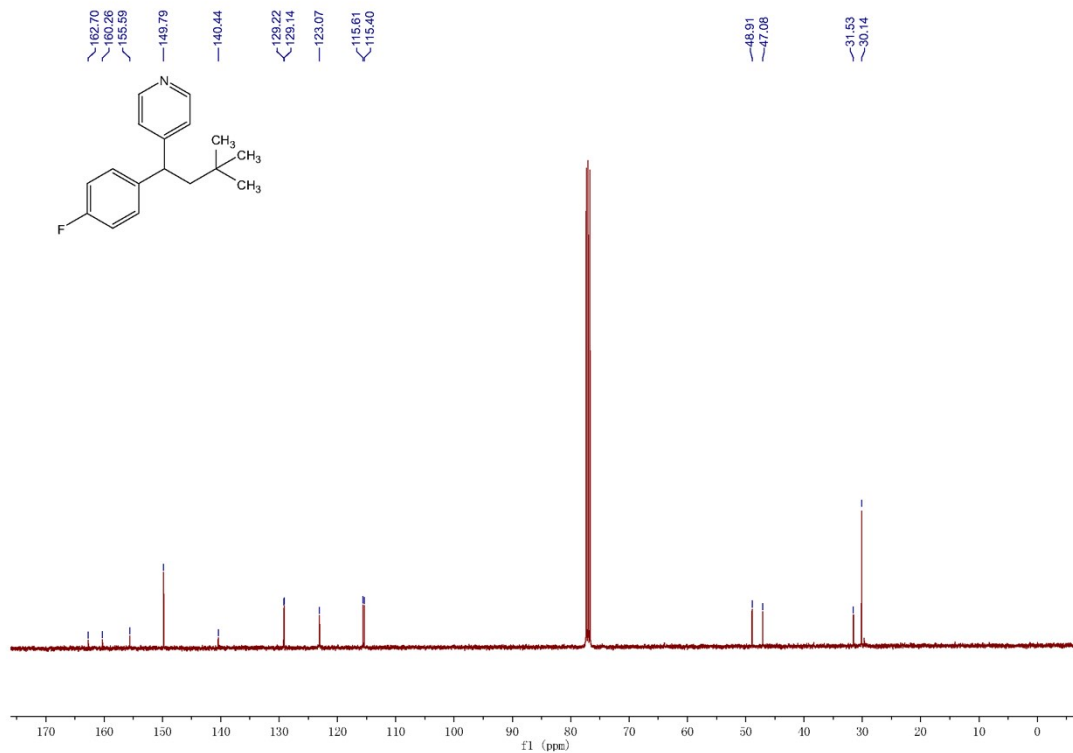

<sup>13</sup>C NMR Spectrum of Compound **19** (100MHz, CDCl<sub>3</sub>)

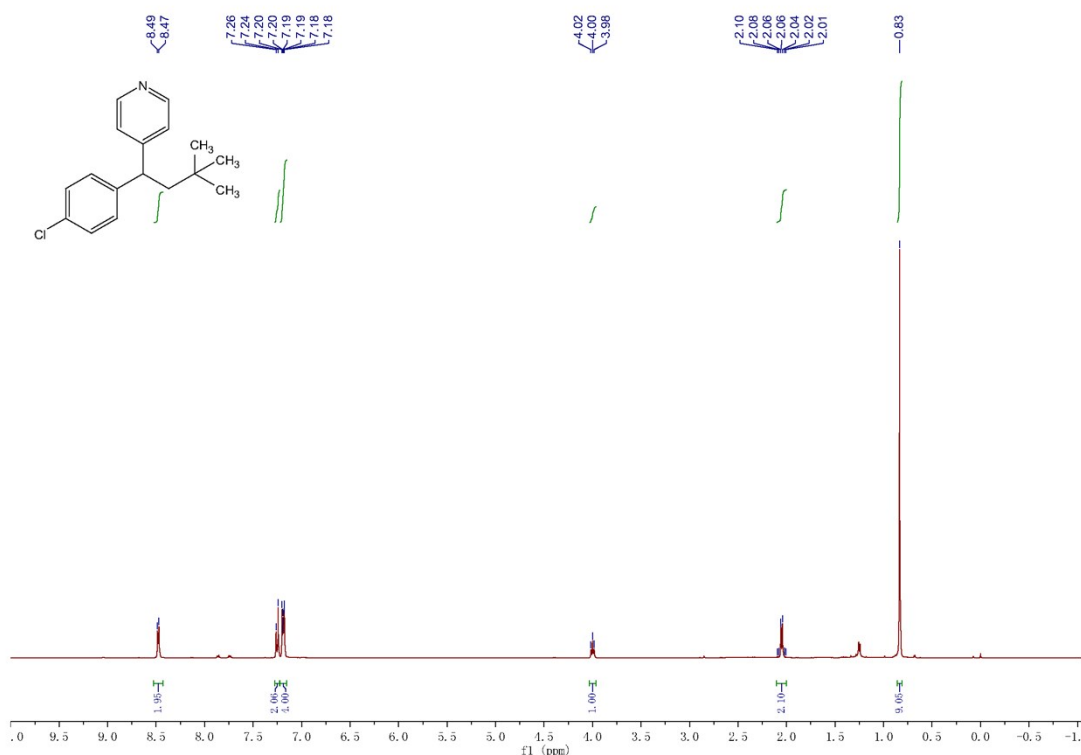

<sup>1</sup>H NMR Spectrum of Compound **20** (400MHz, CDCl<sub>3</sub>)

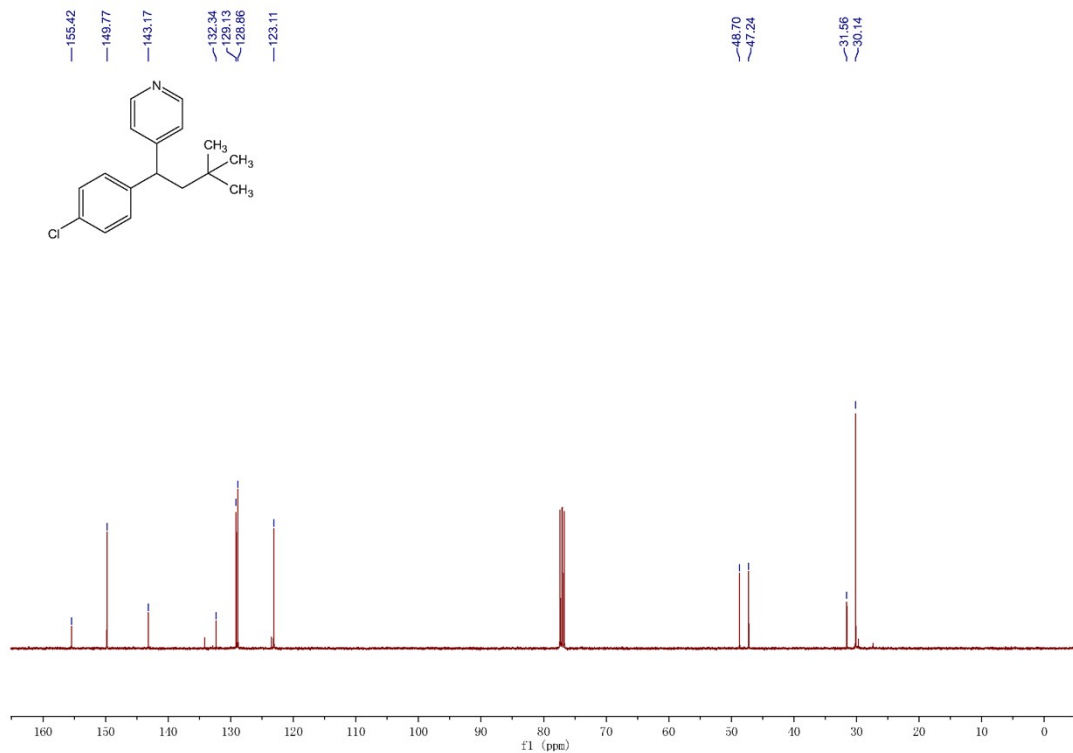

$^{13}\text{C}$  NMR Spectrum of Compound 20 (100MHz,  $\text{CDCl}_3$ )

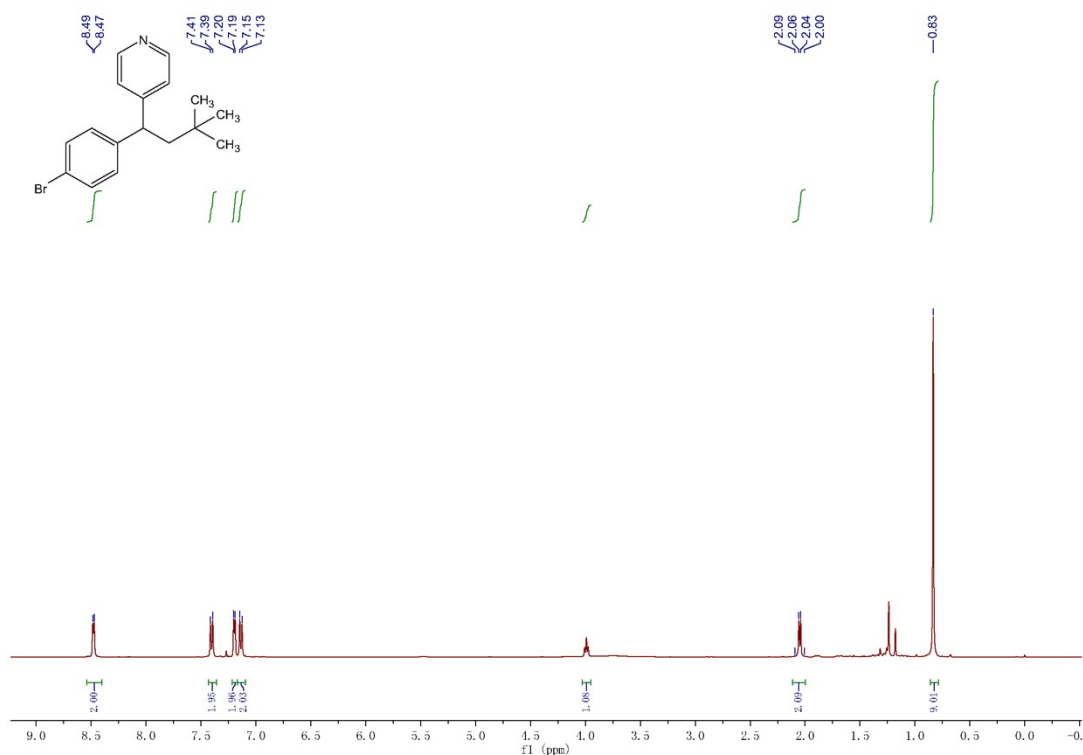

$^1\text{H}$  NMR Spectrum of Compound 21 (400MHz,  $\text{CDCl}_3$ )



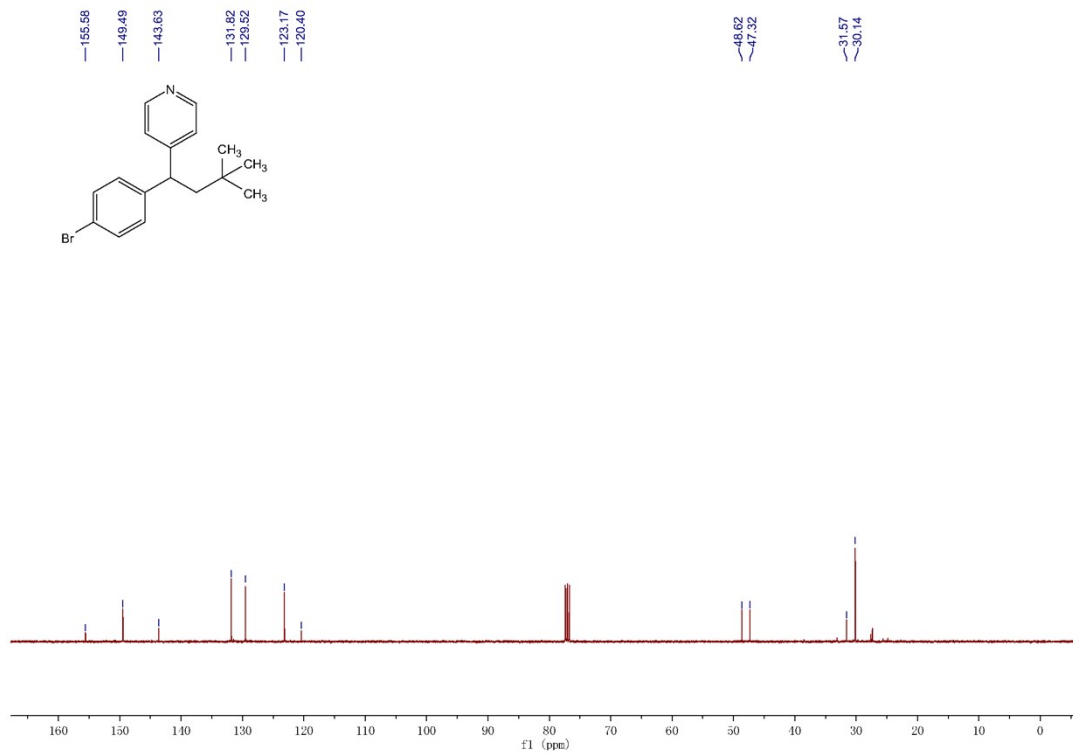

<sup>13</sup>C NMR Spectrum of Compound 21 (100MHz, CDCl<sub>3</sub>)

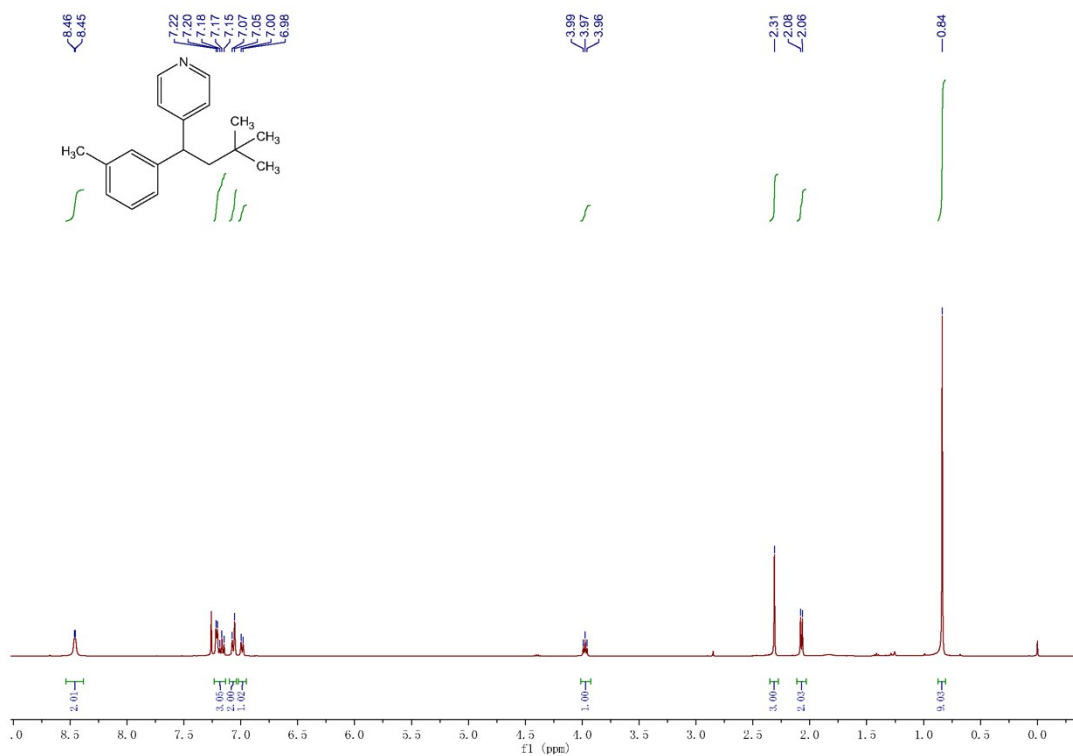

<sup>1</sup>H NMR Spectrum of Compound 22 (400MHz, CDCl<sub>3</sub>)

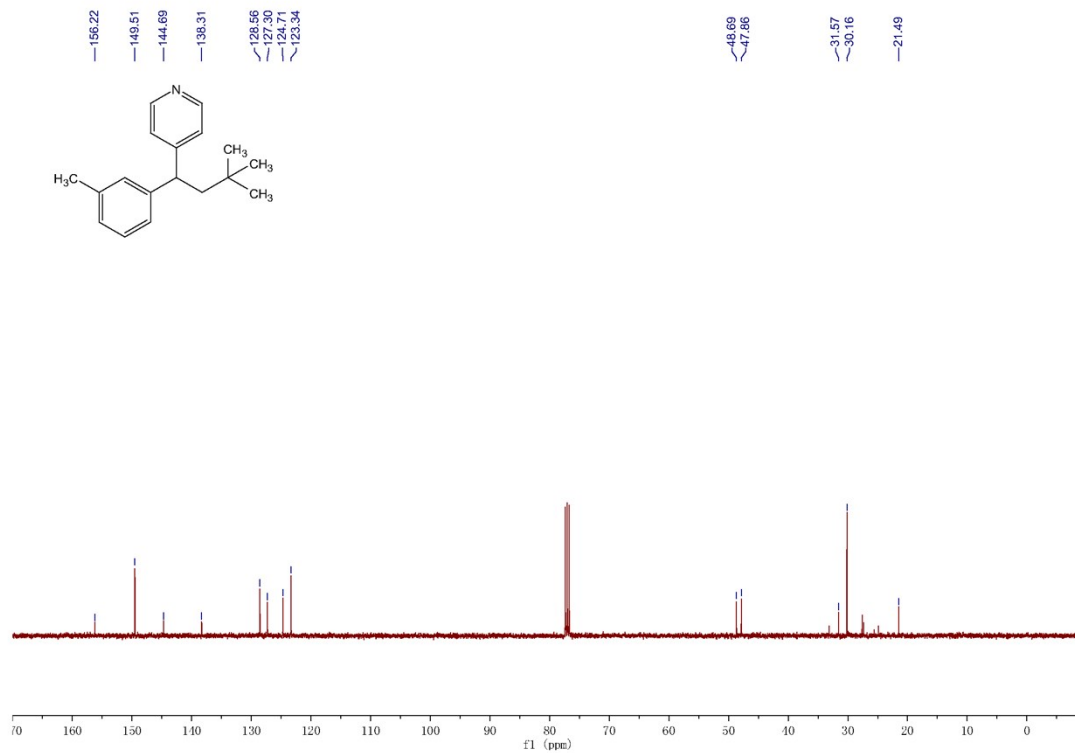

<sup>13</sup>C NMR Spectrum of Compound 22 (100MHz, CDCl<sub>3</sub>)

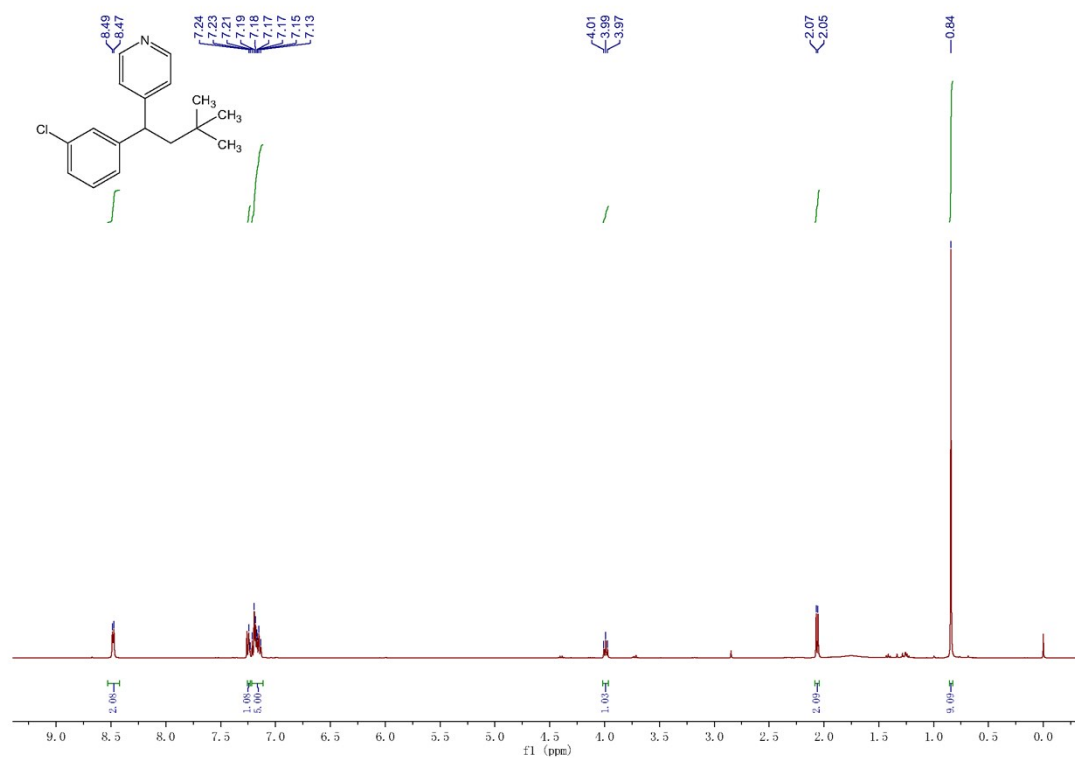

<sup>1</sup>H NMR Spectrum of Compound 23 (400MHz, CDCl<sub>3</sub>)

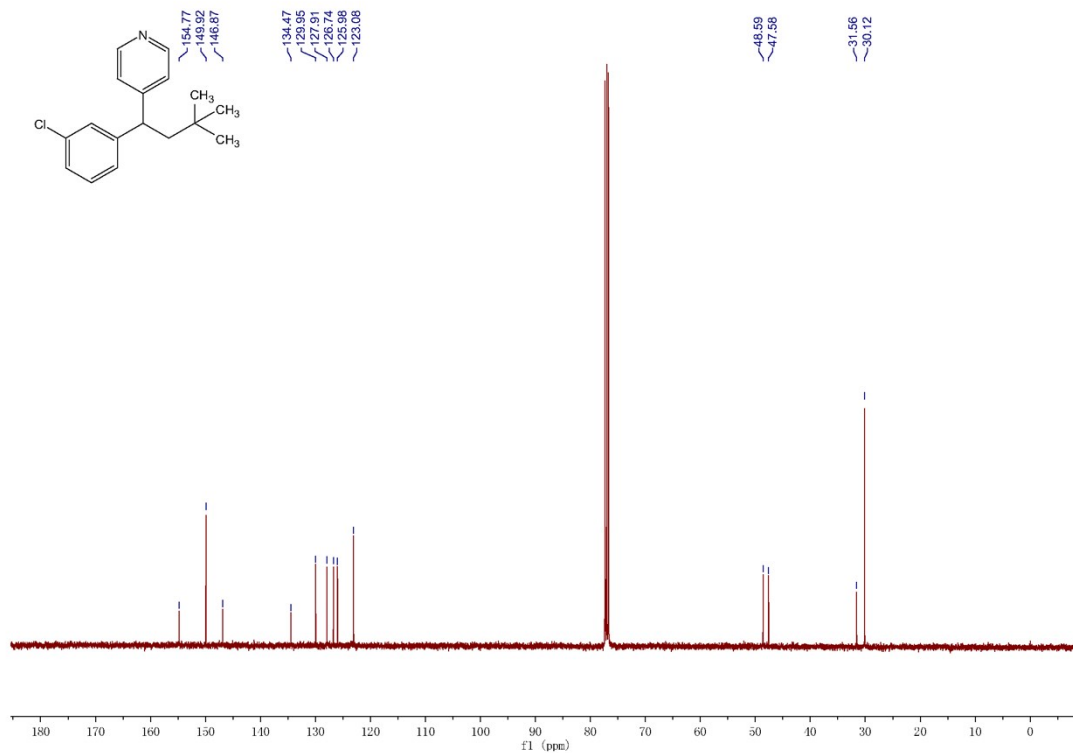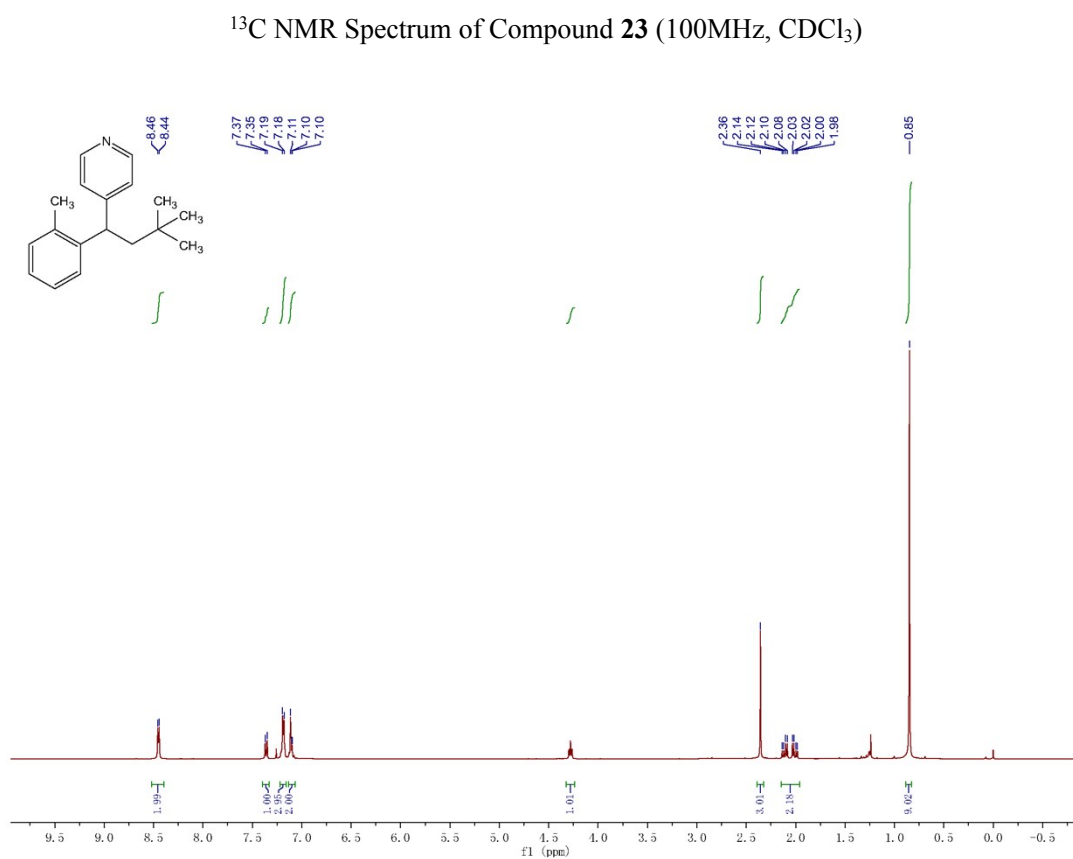

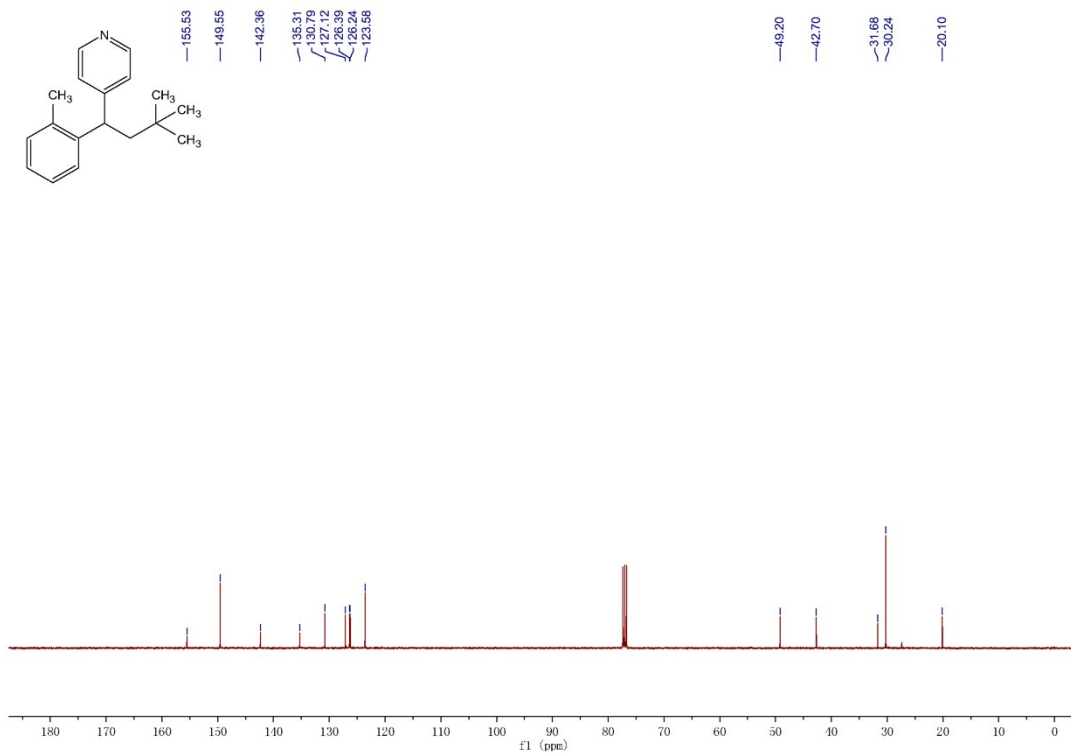

<sup>13</sup>C NMR Spectrum of Compound 24 (100MHz, CDCl<sub>3</sub>)

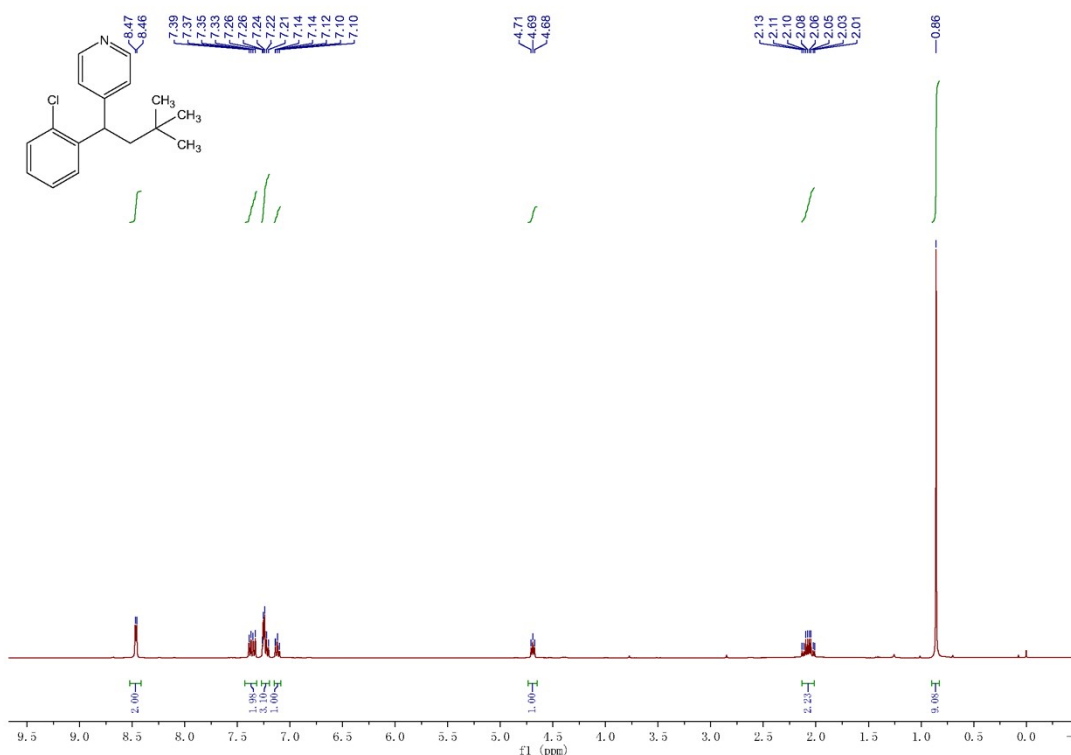

<sup>1</sup>H NMR Spectrum of Compound 25 (400MHz, CDCl<sub>3</sub>)

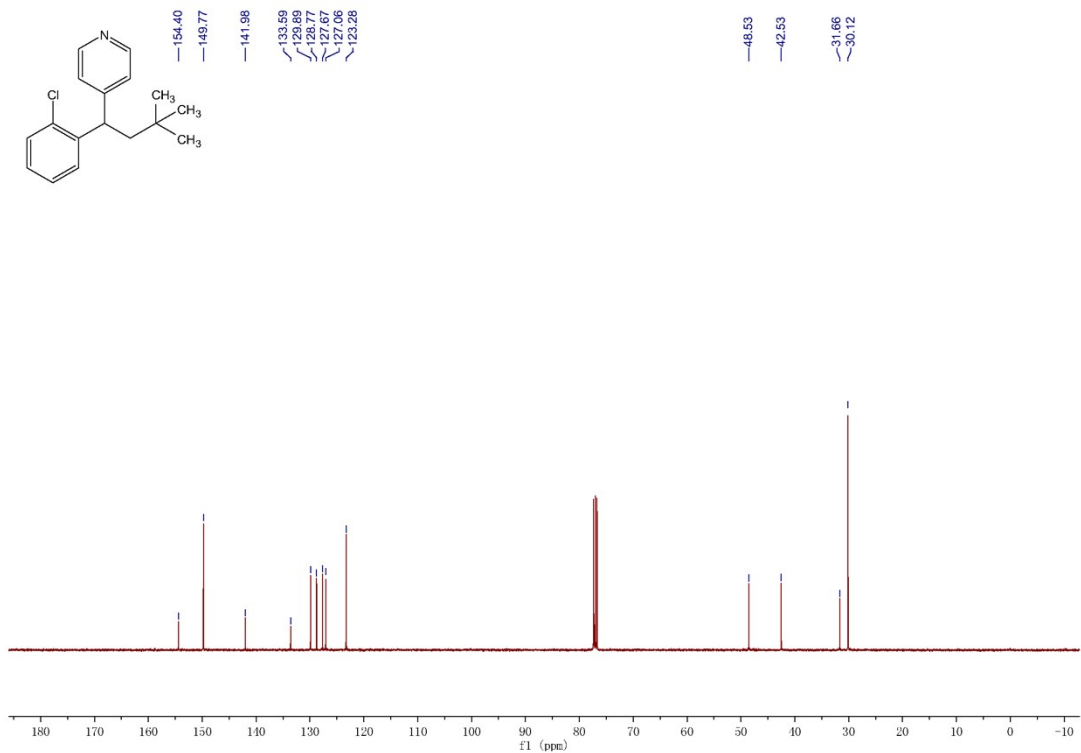

<sup>13</sup>C NMR Spectrum of Compound 25 (100MHz, CDCl<sub>3</sub>)

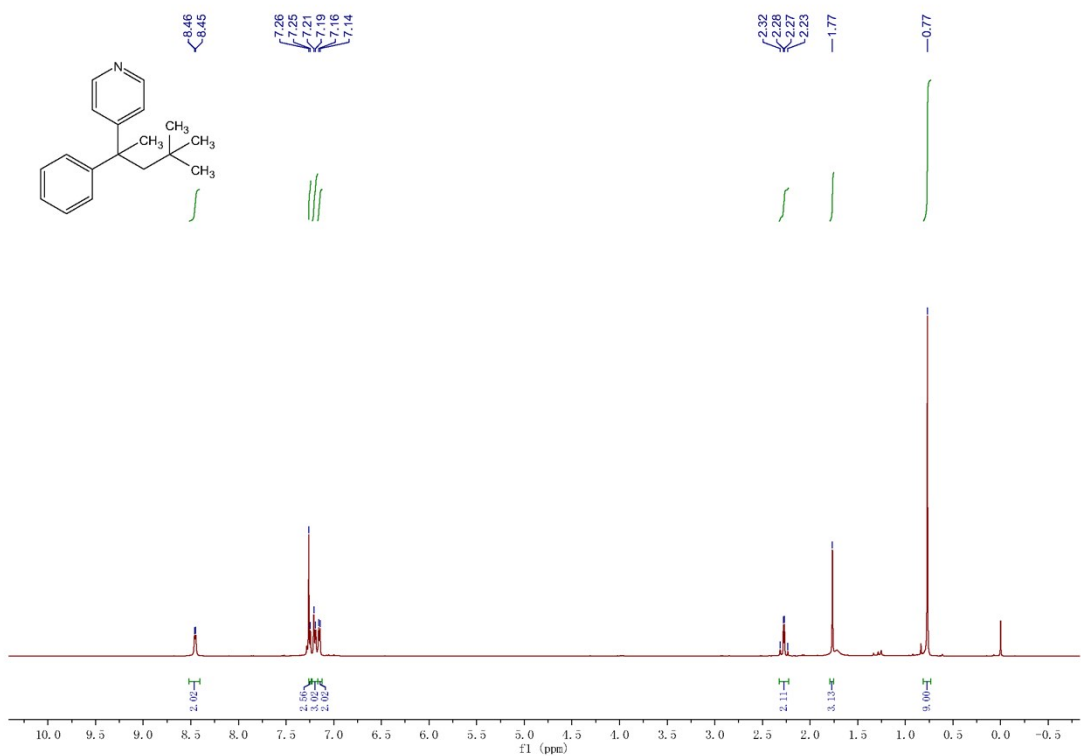

<sup>1</sup>H NMR Spectrum of Compound 26 (400MHz, CDCl<sub>3</sub>)

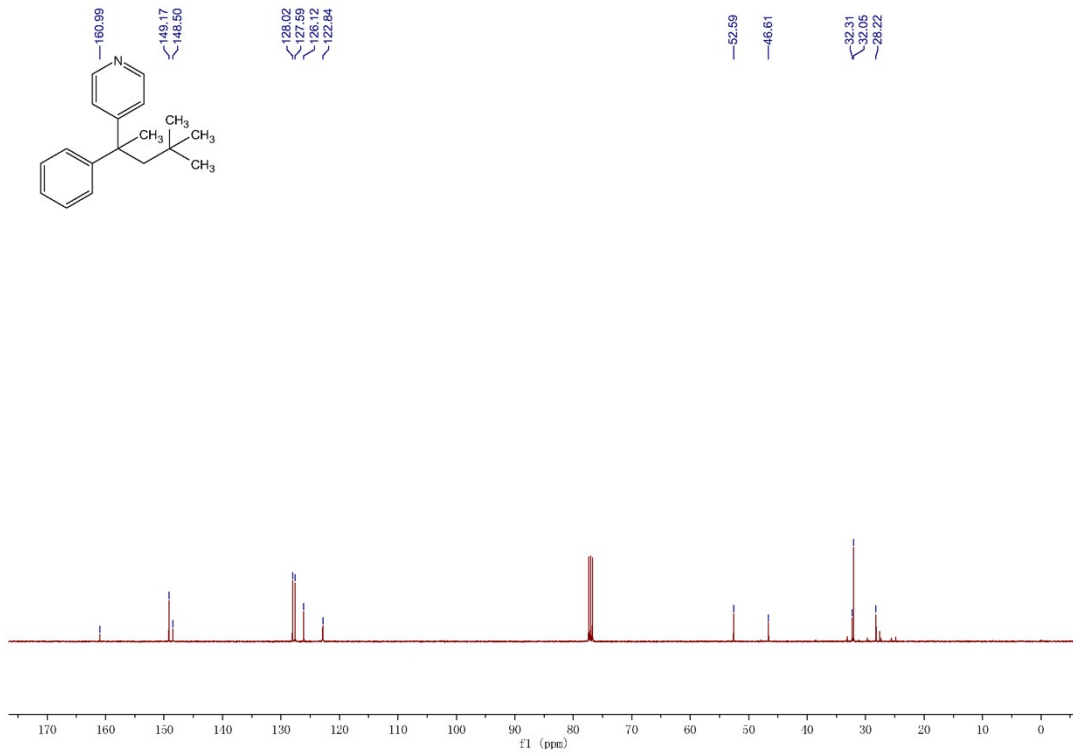

<sup>13</sup>C NMR Spectrum of Compound 26 (100MHz, CDCl<sub>3</sub>)

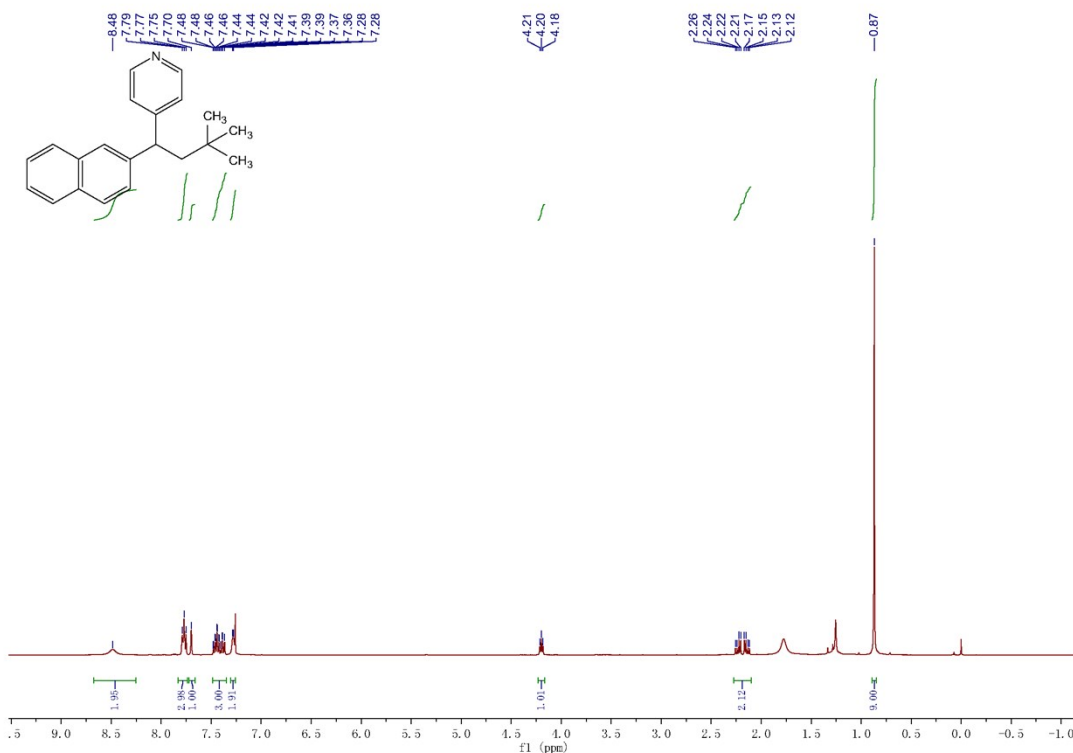

<sup>1</sup>H NMR Spectrum of Compound 27 (400MHz, CDCl<sub>3</sub>)

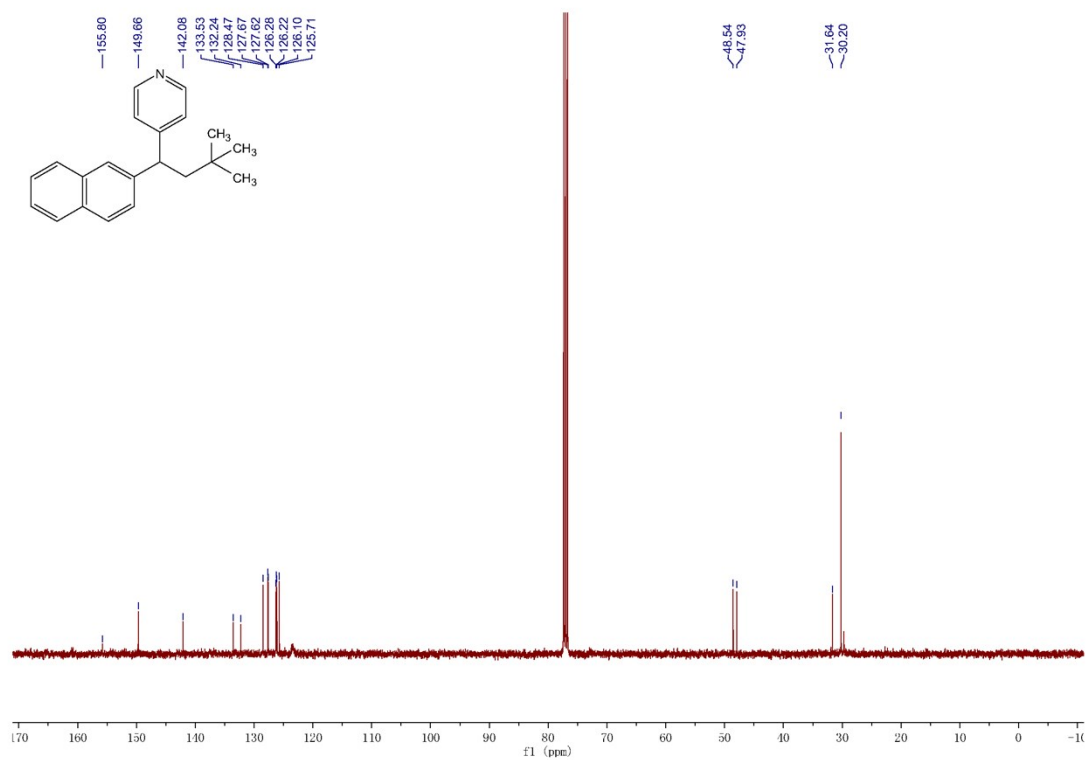

<sup>13</sup>C NMR Spectrum of Compound 27 (100MHz, CDCl<sub>3</sub>)

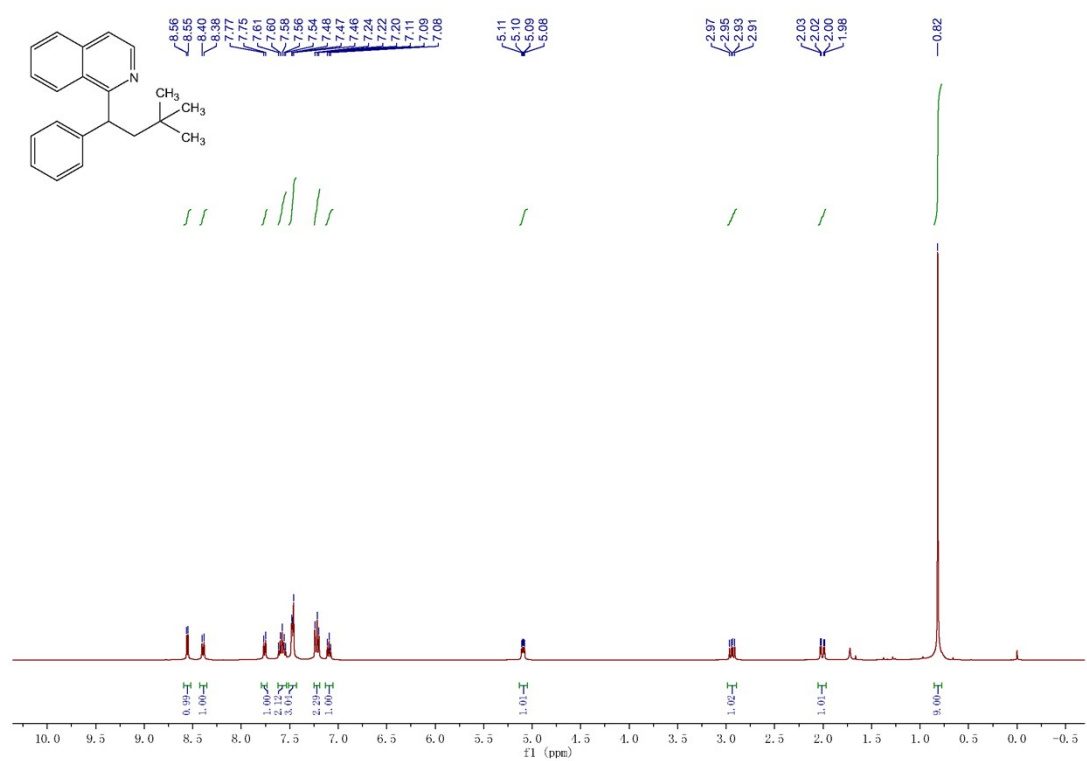

<sup>1</sup>H NMR Spectrum of Compound 28 (400MHz, CDCl<sub>3</sub>)

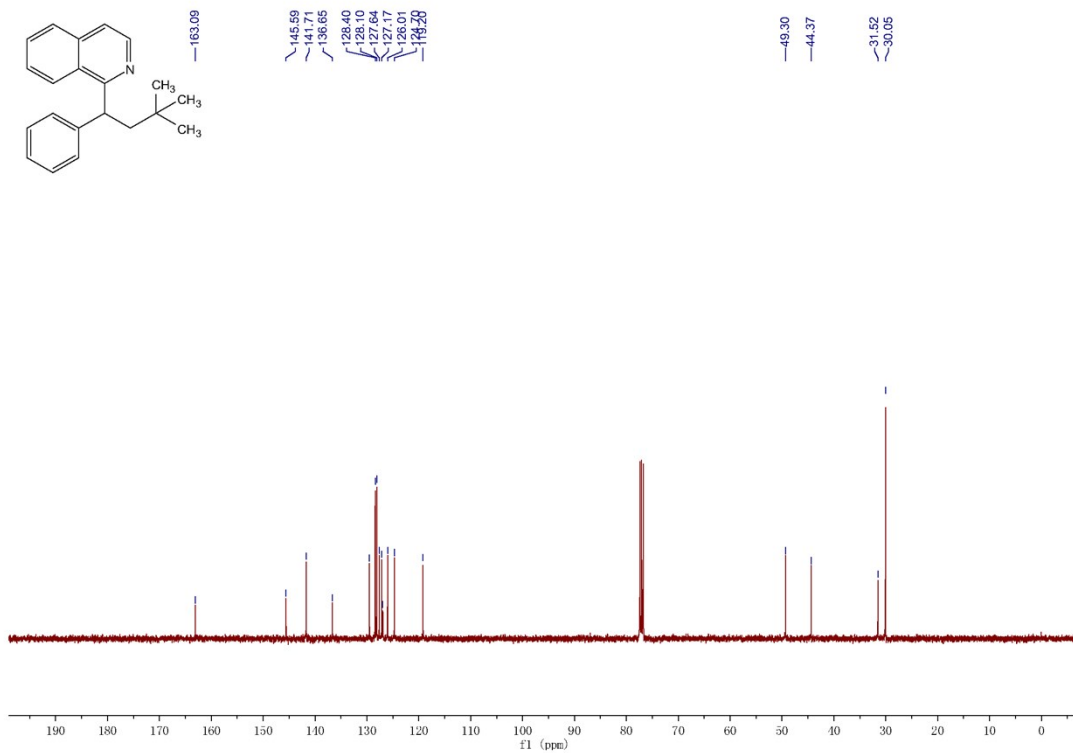

<sup>13</sup>C NMR Spectrum of Compound **28** (100MHz, CDCl<sub>3</sub>)

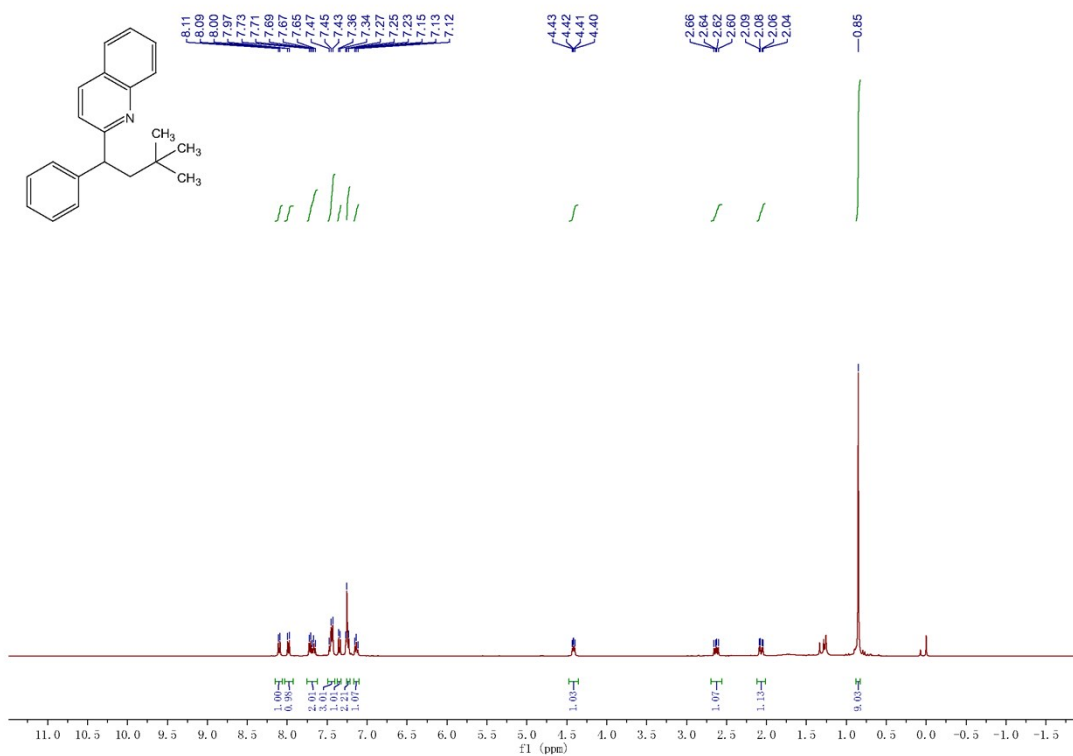

<sup>1</sup>H NMR Spectrum of Compound **29** (400MHz, CDCl<sub>3</sub>)



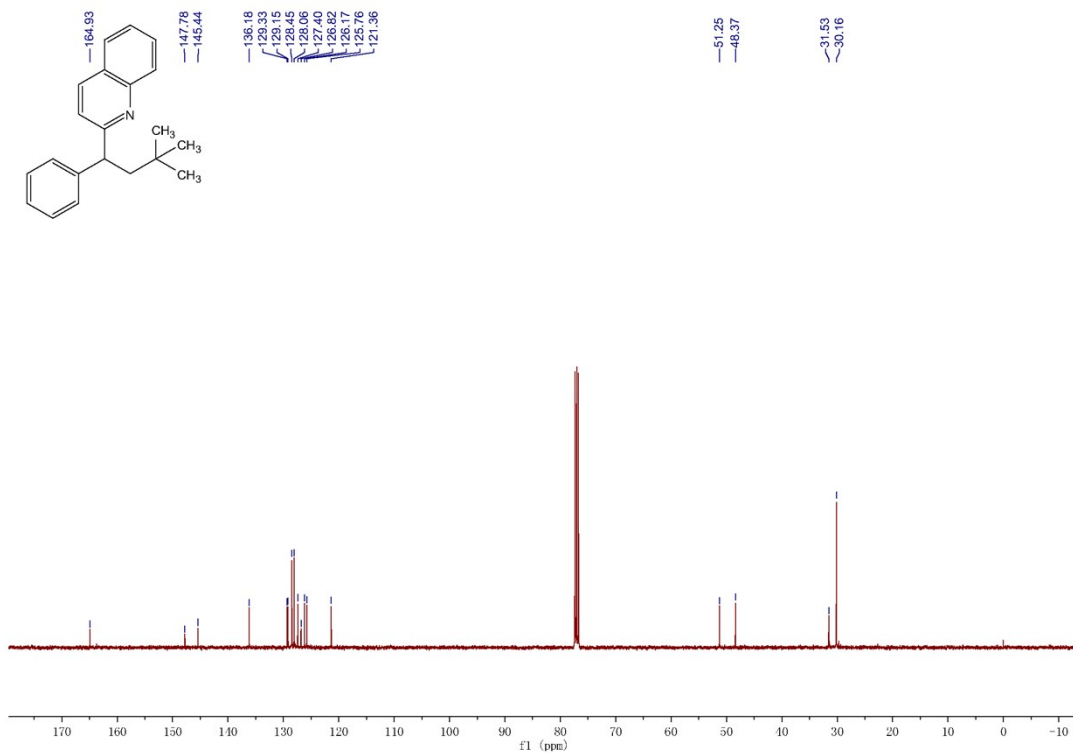

<sup>13</sup>C NMR Spectrum of Compound 29 (100MHz, CDCl<sub>3</sub>)
